# Supplementary material for: An alternative approach to nucleic acid memory
Source: PubMed Central journal article supplement (PMC8062470; doi:10.1038/s41467-021-22277-y), 2021-04-22
Supplement: 41467_2021_22277_MOESM1_ESM.pdf [file 41467_2021_22277_MOESM1_ESM.pdf]

## Supplementary Information – An Alternative Approach to Nucleic Acid Memory

George D. Dickinson<sup>a‡</sup>, Golam Md Mortuza<sup>b‡</sup>, William Clay<sup>a‡</sup>, Luca Piantanida<sup>a‡</sup>, Christopher M. Green<sup>a,c</sup>, Chad Watson<sup>a</sup>, Eric J. Hayden<sup>d</sup>, Tim Andersen<sup>b</sup>, Wan Kuang<sup>e</sup>, Elton Graugnard<sup>a</sup>, Reza Zadegan<sup>a,f</sup> and William L. Hughes<sup>a\*</sup>

<sup>a</sup> Micron School of Materials Science & Engineering, Boise State University, Boise, ID 83725, USA.

<sup>b</sup> Department of Computer Science, Boise State University, Boise, ID 83725, USA.

<sup>c</sup> Now at the Center for Bio/Molecular Science & Engineering, U.S. Naval Research Laboratory, Washington, D.C. 20375, USA.

<sup>d</sup> Department of Biological Sciences, Boise State University, Boise, ID 83725, USA.

<sup>e</sup> Department of Electrical & Computer Engineering, Boise State University, Boise, ID 83725, USA.

<sup>f</sup> Now at the Department of Nanoengineering, Joint School of Nanoscience and Nanoengineering, North Carolina A&T State University, Greensboro, NC 27410, USA.

<sup>‡</sup> Contributed equally

<sup>\*</sup> Corresponding author

## **Table of Contents**

|                                                         |           |
|---------------------------------------------------------|-----------|
| <b><i>Glossary of Terms</i></b> .....                   | <b>3</b>  |
| <b><i>Supplementary Materials and Methods</i></b> ..... | <b>6</b>  |
| Oligonucleotide Sequences.....                          | 6         |
| Encoding/Decoding Algorithms.....                       | 19        |
| Atomic Force Microscopy .....                           | 19        |
| <b><i>Supplementary Results</i></b> .....               | <b>20</b> |
| DNA-PAINT Resolution .....                              | 20        |
| Proximity Error Analysis .....                          | 21        |
| <b><i>Supplementary Diagrams and Charts</i></b> .....   | <b>23</b> |
| Figure S4. The Encoding Algorithm .....                 | 23        |
| Figure S5. The Decoding Algorithm.....                  | 28        |
| Figure S6. Flowchart 1 - Error Correction .....         | 29        |
| Figure S7. Flowchart 2 - Fountain Code Decoding .....   | 30        |
| Figure S8. dNAM Summary .....                           | 31        |
| <b><i>Supplementary Notes</i></b> .....                 | <b>32</b> |
| <b>Writing Speed</b> .....                              | <b>32</b> |
| 1. Echo liquid-handling system capacity .....           | 32        |
| Calculation .....                                       | 32        |
| 2. TWIST Bioscience DNA synthesis .....                 | 32        |
| Calculation .....                                       | 32        |
| 3. Magnetic Tape .....                                  | 32        |
| <b>Storage—Data Density</b> .....                       | <b>33</b> |
| 1. dNAM, unfolded data strands.....                     | 33        |
| Calculations.....                                       | 33        |
| 2. dNAM, data strands folded into origami.....          | 33        |
| Calculations.....                                       | 33        |
| 1. DNA Storage capacity.....                            | 34        |
| 2. Magnetic Tape Capacity.....                          | 34        |
| Calculation .....                                       | 34        |
| <b>Reading Speeds</b> .....                             | <b>35</b> |
| 1. dNAM/DNA-PAINT .....                                 | 35        |
| Calculation .....                                       | 35        |
| 2. NovaSeq 6000 sequencer.....                          | 35        |
| 3. Magnetic Tape.....                                   | 35        |
| <b><i>Supplementary References</i></b> .....            | <b>37</b> |

## **Glossary of Terms**

**AFM:** Atomical Force Microscopy, scanning probe microscopy with a resolution < 1 nm. Uses a cantilever and a probe to physically scan the surface of a sample.

**Archival storage:** Storage of inactive data. Typically, data that is rarely accessed but needs to be retained for long periods of time.

**Binary string:** Here a sequence of bits (i.e. a sequence of 0's and 1's). It can also be used to describe a sequence of bytes – for example, for an 8-bit byte a sequence in which every element is 8-bits long.

**Bit:** A binary digit, the smallest unit of information used by a computer. In dNAM, a bit is encoded by the data strand.

**Byte:** The smallest addressable unit of memory used by a computer, made up of bits (typically 8) and originally used to encode a single character of text.

**Checksum bit:** A bit of the matrix which contains the checksum value from a subset of data bits, orientation bits, and indexing bits.

**Data bit:** A bit of the matrix which contains a bit of information from XORed segments of the message being encoded.

**Data strand:** Selected staple strands within a dNAM origami that are used to encode information, as described in the text. Data strands representing a zero (0) consist of only the staple strand domain. Data strands representing a one (1) consist of the staple strand domain extended by a docking domain, which acts as a docking site for complementary data *imager* strands. Data strands are the information bearing particles in the origami, analogous to the magnetic particles coating a tape or disk used in a tape recorder or hard drive for magnetic recording.

**Decoding algorithm:** The algorithm used to decode messages from individual matrixes.

**Degree distribution:** The distribution of the segments into the droplet.

**dNAM:** Digital NAM, a type of NAM in which information is encoded into defined spatial arrangements of DNA sequences on top of addressable DNA origami nanostructures.

**dNAM origami:** A single rectangular 2D DNA origami nanostructure with specific sequences used to localize data strands to specific sites on the upper surface. This site-specific localization is enabled by extending (1) or not extending (0) the structural staple strands of the DNA origami to create addressable data strands.

**DNA origami:** A self-assembling nanostructure formed through the interactions of numerous short single-strands of DNA (staples) with a long single-strand of M13 DNA (scaffold). The scaffold is folded during assembly, bringing together B-form double helices with their helical axes parallel to each other, and the structure is held together by crossovers between neighboring helices.

**DNA-PAINT:** DNA-Points Accumulation for Imaging in Nanoscale Topography, a DNA based form of stochastic SRM that uses repetitive, transient binding of fluorescently labelled imager strands to circumvent the diffraction limit of light.

**Droplet:** A chunk of data created by a fountain code during transmission of a larger message.

**Greedy algorithm:** A type of algorithm that attempts to determine a globally-optimal solution to a problem by making locally-optimal choices at each search step. It uses a heuristic to determine each choice, such as: always choose the smallest, largest, etc.

**Imager strand:** A short, fluorescently labelled, single strand of DNA, complementary to the docking domain of a data strand that encodes a one (1) in a dNAM origami. In dNAM, imager strands act as the read head and reveal the location of the ones in the dNAM origami.

**Index bit:** A bit of the matrix that is used to encode a unique identifier for each droplet that allows the algorithm to determine the exact message segments that are encoded in the matrix.

**Matrix:** In dNAM, the 2-dimensional representation of the binary data, index, orientation marker, parity, and checksum bits encoded on the DNA.

**NAM:** Nucleic Acid Memory, a memory-storage material comprised of nucleic acids that has the potential for high volumetric density, long retention times, and low energy of operation.

**Orientation bit:** A bit of the matrix which indicates the orientation of the matrix.

**Packet:** A unit of data made into a single package for transmission over a digital network.

**Parity bit:** A bit of the matrix which contains the XORed value from a subset of data bits, orientation bits, indexing bits, and checksum bits, providing a second level of error correction capability.

**Matrix weight:** A float value calculated using the parity and checksum bits that indicates the presence of an error in the matrix.

**Priority queue:** A queue data type with each element in the queue has a priority value assigned. Abbreviated to pqueue here. Elements with high priority are served before elements with low priority.

**Read head:** The component of a recording device that senses the information stored in a memory material. Typically, an electromechanical mechanism that converts the magnetic field of a section of tape or disk platter into an electrical current. In dNAM the imager strands act as read heads.

**Scaffold DNA:** A long single-stranded DNA oligonucleotide (here, a 7249-nucleotide long loop of M13 phage DNA) that is folded via the binding of hundreds of shorter DNA oligonucleotides to form a self-assembling nanostructure. The shape of the resulting DNA-origami is determined by the choice of staples and scaffold (which runs throughout the structure) in a highly predictable manner - allowing rational design of complex 2 and 3-D structures.

**SRM:** Super-Resolution Microscopy, a class of light microscope techniques capable of surpassing the optical diffraction resolution limit of ~250 nm.

**Staple strand:** A short (typically 15-60 nucleotides) single-stranded DNA oligonucleotide used to fold scaffold DNA during the formation of DNA origami. The staple strands form crossovers between neighboring scaffold strand helices.

**XOR operation:** The binary exclusive OR operation ( $\oplus$ ) in which corresponding bits of a binary number are compared and yields true (1) if exactly one of two conditions is true (false = 0), see Table 1. For multiple arguments, XOR is defined to be true if an odd number of its arguments are true, and false otherwise (equivalent to addition modulo 2). See Table 2 for a three-argument function.

**Table 1**

| a | b | $a \oplus b$ |
|---|---|--------------|
| 0 | 0 | 0            |
| 0 | 1 | 1            |
| 1 | 0 | 1            |
| 1 | 1 | 0            |

**Table 2**

| a | b | c | $a \oplus b \oplus c$ |
|---|---|---|-----------------------|
| 1 | 1 | 1 | 1                     |
| 1 | 1 | 0 | 0                     |
| 1 | 0 | 1 | 0                     |
| 1 | 0 | 0 | 1                     |
| 0 | 1 | 1 | 0                     |
| 0 | 1 | 0 | 1                     |
| 0 | 0 | 1 | 1                     |
| 0 | 0 | 0 | 0                     |

**'\n' character:** In many programming languages '\n' represents a newline escape character (i.e. an instruction to insert a newline at this point).

## Supplementary Materials and Methods

### Oligonucleotide Sequences

| Name                   | Sequence                                 | Role         |
|------------------------|------------------------------------------|--------------|
| n0-Ptt-1LR2-1LR1-Ptt   | TTTTCACGTTGAAAATCTCGCGAATAATAATTTTTTTTT  | Registration |
| n0-Ptt-1LR4-1LR3-Ptt   | TTTAGGAAGTTTCCATTAATAAAGACTTTTTTCATGTTT  | Registration |
| n0-Ptt-1LR6-1LR5-Ptt   | TTTCAGGCGCATAGGCTGGTGAACGGGTACAGACTTT    | Registration |
| n0-Ptt-1LR8-1LR7-Ptt   | TTTGGTAGAAAGATTCATCGAACAACATTATTACATTT   | Registration |
| n0-Ptt-1LR10-1LR9-Ptt  | TTTTGACCATAAATCAAAAGTTCAGAAAACGAGAAATTT  | Registration |
| n0-Ptt-1LR12-1LR11-Ptt | TTTGTGTCTGGAAGTTTCAATGCAACTAAAGTACGTTT   | Registration |
| n0-Ptt-1LR14-1LR13-Ptt | TTTTTTTTGCGGGAGAAGCCTATGACCCTGTAATACTTT  | Registration |
| n0-Ptt-1LR16-1LR15-Ptt | TTTGTCAATCATATGTACCATCGTAAAACCTAGCATTTT  | Registration |
| n0-Ptt-1LR18-1LR17-Ptt | TTTGTGTAGATGGGCGCATGGGATAGGTCACGTTGTTT   | Registration |
| n0-Ptt-1LR20-1LR19-Ptt | TTTAGTGCCAAGCTTGCATTTGTAAAACGACGGCCTTT   | Registration |
| n0-Ptt-1LR22-1LR21-Ptt | TTTTATTGGGCGCCAGGGTGGAGAGCGGTTTTCGTTT    | Registration |
| n0-Ptt-1LR24-1LR23-Ptt | TTTTGGCCCACTACGTGAACCGTCTATCAGGGCGATTT   | Registration |
| n0-Ptt-RR1-RR2-Ptt     | TTTCAGAACCGCCACCCTCTCAGAACCGCCACCCTTTT   | Registration |
| n0-Ptt-RR3-RR4-Ptt     | TTTATACAGGAGTGTACTGTACATGGCTTTTGATGTTT   | Registration |
| n0-Ptt-RR5-RR6-Ptt     | TTTCGTTTGCCATCTTTTCATAGCCCCCTTATTAGTTT   | Registration |
| n0-Ptt-RR7-RR8-Ptt     | TTTCAAAGACAAAAGGGCGTATGGTTTACCAGCGCTTT   | Registration |
| n0-Ptt-RR9-RR10-Ptt    | TTTAGAGCAAGAAACAATGGTTAAGCCCAATAATATTT   | Registration |
| n0-Ptt-RR11-RR12-Ptt   | TTTCAATTTTATCCTGAATATTTTGCACCCAGCTATTT   | Registration |
| n0-Ptt-RR13-RR14-Ptt   | TTTTATCCCATCCTAATTTTGAACAAGAAAAATAATTT   | Registration |
| n0-Ptt-RR15-RR16-Ptt   | TTTCATAATTACTAGAAAAGAATAAACACCGGAATTTT   | Registration |
| n0-Ptt-RR17-RR18-Ptt   | TTTAATCCTTGAAAACATAATTAATTTTCCCTTAGTTT   | Registration |
| n0-Ptt-RR19-RR20-Ptt   | TTTAGATGAATATACAGTATTTTCAGGTTTAAACGTCTTT | Registration |
| n0-Ptt-RR21-RR22-Ptt   | TTTAGACTTTACAAACAATAGGATTTAGAAGTATTTTT   | Registration |
| n0-Ptt-RR23-RR24-Ptt   | TTTAAAAATACCGAACGAACATAAACATCGCCATTTTT   | Registration |
| n0--A8-A10-            | TTTAGGACAAATGCTTTAAACAATCAGGTC           | Blocking     |
| n0--A10-A12-           | TTTACCCCAACATGTTTTAAATTTCCATAT           | Blocking     |
| n0--A12-A14-           | AACAGTTTTGTACCAAAAACATTTTATTTT           | Blocking     |
| n0--A14-A16-           | AACGCAAAATCGATGAACGGTACCGGTTGA           | Blocking     |
| n0--A16-A18-           | TAATCAGCGGATTGACCGTAATCGTAACCG           | Blocking     |
| n0--B1-A2-             | AGAAAGGAACAACATAAAGGAATTCAAAAAA          | Blocking     |
| n0--A18-A20-           | TGCATCTTTCCAGTCACGACGGCCTGCAG            | Blocking     |

|              |                                   |          |
|--------------|-----------------------------------|----------|
| n0--A20-A22- | GTCGACTTCGGCCAACGCGGGGTTTTTC      | Blocking |
| n0--A22-A24- | TTTTCACTCAAAGGGCGAAAAACCATCACC    | Blocking |
| n0--A2-A4-   | AGGCTCCAGAGGCTTTGAGGACACGGGTAA    | Blocking |
| n0--A4-A6-   | AATACGTTTGAAGAGGACAGACTGACCTT     | Blocking |
| n0--A6-A8-   | CATCAAGTAAAACGAAC TAACGAGTTGAGA   | Blocking |
| n0--B3-B1-   | ACGGCTACAAAAGGAGCCTTTAATGTGAGAAT  | Blocking |
| n0--B13-B11- | TAAATCGGGATTCCCAATTCTGCGATATAATG  | Blocking |
| n0--B15-B13- | AACAAGAGGGATAAAAAATTTTAGCATAAAGC  | Blocking |
| n0--B17-B15- | ACAAACGGAAAAGCCCCAAAACACTGGAGCA   | Blocking |
| n0--B19-B17- | CCAGGGTTGCCAGTTTGAGGGGACCCGTGGGA  | Blocking |
| n0--B21-B19- | TTAATGAACTAGAGGATCCCCGGGGGGTAACG  | Blocking |
| n0--B23-B21- | CTCCAACGCAGTGAGACGGGCAACCAGCTGCA  | Blocking |
| n0--A24-B23- | CAAATCAAGTTTTTTGGGGTCGAAACGTGGA   | Blocking |
| n0--B5-B3-   | GACCAACTAATGCCACTACGAAGGGGGTAGCA  | Blocking |
| n0--B7-B5-   | TACGTTAAAGTAATCTTGACAAGAACC GAACT | Blocking |
| n0--B9-B7-   | ATCCCCCTATACCACATTCAACTAGAAAAATC  | Blocking |
| n0--B11-B9-  | CTGTAGCTTGACTATTATAGTCAGTTCATTGA  | Blocking |
| n0--C8-C10-  | ACATAACGGGAATCGTCATAAATAAAGCAAAG  | Blocking |
| n0--C10-C12- | CGGATTGCAGAGCTTAATTGCTGAAACGAGTA  | Blocking |
| n0--C12-C14- | GATTTAGTCAATAAAGCCTCAGAGAACCCTCA  | Blocking |
| n0--C14-C16- | TATATTTTGTCAATTGCCTGAGAGTGGAAGATT | Blocking |
| n0--C16-C18- | GTATAAGCCAACCCGTCCGATTCTGACGACAG  | Blocking |
| n0--D1-C2-   | ACAAC TTTCAACAGTTTCAGCGGATGTATCGG | Blocking |
| n0--C18-C20- | TATCGGCCGCAAGGCGATTAAGTTTACCGAGC  | Blocking |
| n0--C20-C22- | TCGAATTCGGGAAACCTGTCGTGCAGCTGATT  | Blocking |
| n0--C22-C24- | GCCCTTCAGAGTCCACTATTAAGGGTGCCGT   | Blocking |
| n0--C2-C4-   | TTTATCAGGACAGCATCGGAACGACACCAACC  | Blocking |
| n0--C4-C6-   | TAAAACGAGGTCAATCATAAGGGAACCGGATA  | Blocking |
| n0--C6-C8-   | TTCATTACGTCAGGACGTTGGGAAATGCAGAT  | Blocking |
| n0--D3-D1-   | CAGCGAAACTTGCTTTTCGAGGTGTTGCTAA   | Blocking |
| n0--D13-D11- | AAATTAAGTTGACCATTAGATACTTTTTGCG   | Blocking |
| n0--D15-D13- | GCTATCAGAAATGCAATGCCTGAATTAGCA    | Blocking |
| n0--D17-D15- | GCGAGTAAAAATATTTAAATTGTTACAAAG    | Blocking |
| n0--D19-D17- | GATGTGCTTCAGGAAGATCGCACAATGTGA    | Blocking |
| n0--D21-D19- | TTCCAGTCGTAATCATGGTCATAAAAAGGGG   | Blocking |
| n0--D23-D21- | TGGAACAACCGCCTGGCCCTGAGCCCCGCT    | Blocking |
| n0--C24-D23- | AAAGCACTAAATCGGAACCCTAATCCAGTT    | Blocking |
| n0--D5-D3-   | GCGCAGACAAGAGGCAAAAAGAAATCCCTCAG  | Blocking |
| n0--D7-D5-   | TTATACCACCAAATCAACGTAACGAACGAG    | Blocking |
| n0--D9-D7-   | AATACTGCCCAAAAAGGAATTACGTGGCTCA   | Blocking |
| n0--D11-D9-  | GATGGCTTATCAAAAAGATTAAGAGCGTCC    | Blocking |

|              |                                   |          |
|--------------|-----------------------------------|----------|
| n0--E8-E10-  | TAAGAGCAAATGTTTAGACTGGATAGGAAGCC  | Blocking |
| n0--E10-E12- | CGAAAGACTTTTGATAAGAGGTCATATTTGCA  | Blocking |
| n0--E12-E14- | AATGGTCAACAGGCAAGGCAAAGAGTAATGTG  | Blocking |
| n0--E14-E16- | TAGGTAAACTATTTTTGAGAGATCAAACGTTA  | Blocking |
| n0--E16-E18- | ATATTTTGGCTTTTCATCAACATTATCCAGCCA | Blocking |
| n0--F1-E2-   | TAAATGAATTTTCTGTATGGGATTAATTTCTT  | Blocking |
| n0--E18-E20- | GCTTTCCGATTACGCCAGCTGGCGGCTGTTTC  | Blocking |
| n0--E20-E22- | CTGTGTGATTGCGTTGCGCTCACTAGAGTTGC  | Blocking |
| n0--E22-E24- | AGCAAGCGTAGGGTTGAGTGTGTAGGGAGCC   | Blocking |
| n0--E2-E4-   | AAACAGCTTTTTGCGGGATCGTCAACACTAAA  | Blocking |
| n0--E4-E6-   | ACACTCATCCATGTTACTTAGCCGAAAGCTGC  | Blocking |
| n0--E6-E8-   | TCATTCAGATGCGATTTTAAGAACAGGCATAG  | Blocking |
| n0--F3-F1-   | AAGGCCGCTGATACCGATAGTTGCGACGTTAG  | Blocking |
| n0--F13-F11- | TAAATCATATAACCTGTTTAGCTAACCTTTAA  | Blocking |
| n0--F15-F13- | GAGGGTAGGATTCAAAAGGGTGAGACATCCAA  | Blocking |
| n0--F17-F15- | TGTAGCCATTAATAATTCGCATTAATGCCGGA  | Blocking |
| n0--F19-F17- | TCTTCGCTGCACCGCTTCTGGTGCGGCCCTTCC | Blocking |
| n0--F21-F19- | CACATTAATAATTGTTATCCGCTCATGCGGGCC | Blocking |
| n0--F23-F21- | GCCCGAGAGTCCACGCTGGTTTGCAGCTAACT  | Blocking |
| n0--E24-F23- | CCCGATTTAGAGCTTGACGGGGAAAAAGAATA  | Blocking |
| n0--F5-F3-   | GACCTGCTCTTTGACCCCCAGCGAGGGAGTTA  | Blocking |
| n0--F7-F5-   | ATTACCTTTGAATAAGGCTTGCCAAATCCGC   | Blocking |
| n0--F9-F7-   | AATAGTAAACACTATCATAACCCTCATTGTGA  | Blocking |
| n0--F11-F9-  | TTGCTCCTTTCAAATATCGCGTTTGAGGGGGT  | Blocking |
| n0--G8-G10-  | AGACGACAAAGAAGTTTTGCCATAATTCCA    | Blocking |
| n0--G10-G12- | GCTTCAATCAGGATTAGAGAGTTATTTTCA    | Blocking |
| n0--G12-G14- | TTTGGGGATAGTAGTAGCATTAAAAGGCCG    | Blocking |
| n0--G14-G16- | GAGACAGCTAGCTGATAAATTAATTTTTGT    | Blocking |
| n0--G16-G18- | TAAATCAAATAAATTCGCGTCTCGGAAACC    | Blocking |
| n0--H1-G2-   | TCTAAAGTTTTGTCGTCTTTCCAGCCGACAA   | Blocking |
| n0--G18-G20- | AGGCAAAGGGAAGGGCGATCGGCAATTCCA    | Blocking |
| n0--G20-G22- | CACAACAGGTGCCTAATGAGTGCCAGCAG     | Blocking |
| n0--G22-G24- | GCGAAAAATCCCTTATAAATCAAGCCGGCG    | Blocking |
| n0--G2-G4-   | TGACAACTCGCTGAGGCTTGCAATTATACCA   | Blocking |
| n0--G4-G6-   | AGCGCGATGATAAATTGTGTCGTGACGAGA    | Blocking |
| n0--G6-G8-   | AACACCAAATTTCAACTTTAATCGTTTTACC   | Blocking |
| n0--J1-H1-   | TCCACAGACAGCCCTCATAGTTAGCGTAACGA  | Blocking |
| n0--I10-H11- | AGAGAGAAAAAATGAAAATAGCAAGCAAACCT  | Blocking |
| n0--I12-H13- | CCAATAGCTCATCGTAGGAATCATGGCATCAA  | Blocking |
| n0--I14-H15- | GTAATAAGTTAGGCAGAGGCATTTATGATATT  | Blocking |
| n0--I16-H17- | ATCGCAAGTATGTAAATGCTGATGATAGGAAC  | Blocking |



|              |                                   |          |
|--------------|-----------------------------------|----------|
| n0--I18-H19- | AGAAAACAAAGAAGATGATGAAACAGGCTGCG  | Blocking |
| n0--I20-H21- | GCAATTCACATATTCCTGATTATCAAAGTGTA  | Blocking |
| n0--I22-H23- | TCAATATCGAACCTCAAATATCAATTCGAAA   | Blocking |
| n0--I2-H3-   | TTAGGATTGGCTGAGACTCCTCAATAACCGAT  | Blocking |
| n0--I4-H5-   | TTGACAGGCCACCACCAGAGCCGCGATTTGTA  | Blocking |
| n0--I6-H7-   | GCAAGGCCTCACCAGTAGCACCATGGGCTTGA  | Blocking |
| n0--I8-H9-   | TTATTACGAAGAACTGGCATGATTGCGAGAGG  | Blocking |
| n0--H11-I10- | CCAACAGGAGCGAACCCAGACCGGAGCCTTTAC | Blocking |
| n0--H13-I12- | TTCTACTACGCGAGCTGAAAAGTTACCGCGC   | Blocking |
| n0--H15-I14- | CAACCGTTTCAAATCACCATCAATTCGAGCCA  | Blocking |
| n0--H17-I16- | GCCATCAAGCTCATTTTTTAACCACAAATCCA  | Blocking |
| n0--H19-I18- | CAACTGTTGCGCCATTGCGCATTCAAACATCA  | Blocking |
| n0--H3-I2-   | ATATTCGGAACCATCGCCACGCAGAGAAGGA   | Blocking |
| n0--H21-I20- | AAGCCTGGTACGAGCCGGAAGCATAGATGATG  | Blocking |
| n0--H23-I22- | TCGGCAAATCCTGTTTGATGGTGGACCCTCAA  | Blocking |
| n0--G24-I24- | AACGTGGCGAGAAAAGGAAGGAAACCAGTAA   | Blocking |
| n0--H5-I4-   | TCATCGCCAACAAAGTACAACGGACGCCAGCA  | Blocking |
| n0--H7-I6-   | GATGGTTTGAACGAGTAGTAAATTTACCATTA  | Blocking |
| n0--H9-I8-   | CTTTTGCAGATAAAAACCAAATAAAGACTCC   | Blocking |
| n0--J3-J1-   | TATTAAGAAGCGGGGTTTTGCTCGTAGCAT    | Blocking |
| n0--J13-J11- | TTTTATTTAAGCAAATCAGATATTTTTTGT    | Blocking |
| n0--J15-J13- | CATGTAATAGAATATAAAGTACCAAGCCGT    | Blocking |
| n0--J17-J15- | TATAACTAACAAAGAACGCGAGAACGCCAA    | Blocking |
| n0--J19-J17- | CTGAGCAAAAATTAATTACATTTTGGGTTA    | Blocking |
| n0--J21-J19- | ATTATCATTCAATATAATCCTGACAATTAC    | Blocking |
| n0--J23-J21- | ACCTTGCTTGGTCAGTTGGCAAAGAGCGGA    | Blocking |
| n0--I24-J23- | TAAAAGGGACATTCTGGCCAACAAAGCATC    | Blocking |
| n0--J5-J3-   | CACCAGAAAGGTTGAGGCAGGTCATGAAAG    | Blocking |
| n0--J7-J5-   | CAGCAAAAGGAAACGTCACCAATGAGCCGC    | Blocking |
| n0--J9-J7-   | ATACCCAACAGTATGTTAGCAAATTAGAGC    | Blocking |
| n0--J11-J9-  | TTAACGTCTAACATAAAAACAGGTAACGGA    | Blocking |
| n0--K8-K10-  | ATACATACCGAGGAAACGCAATAAGAAGCGCA  | Blocking |
| n0--K10-K12- | TTAGACGGCCAAATAAGAAACGATAGAAGGCT  | Blocking |
| n0--K12-K14- | TATCCGGTCTCATCGAGAACAAGCGACAAAAG  | Blocking |
| n0--K14-K16- | GTAAAGTAATCGCCATATTTAACAAAACTTTT  | Blocking |
| n0--K16-K18- | TCAAATATAACCTCCGGCTTAGGTAACAATTT  | Blocking |
| n0--L1-K2-   | TCACCAGTACAAACTACAACGCCTAGTACCAG  | Blocking |
| n0--K18-K20- | CATTTGAAGGCGAATTATTCATTTTTGTTTGG  | Blocking |
| n0--K20-K22- | ATTATACTAAGAAACCACCAGAAGTCAACAGT  | Blocking |
| n0--K22-K24- | TGAAAGGAGCAAATGAAAAATCTAGAGATAGA  | Blocking |
| n0--K2-K4-   | GCGGATAACCTATTATTCTGAAACAGACGATT  | Blocking |

|              |                                   |          |
|--------------|-----------------------------------|----------|
| n0--K4-K6-   | GGCCTTGAAGAGCCACCACCCTCAGAAACCAT  | Blocking |
| n0--K6-K8-   | CGATAGCATTGAGCCATTTGGGAACGTAGAAA  | Blocking |
| n0--L3-L1-   | TTTCGGAAGTGCCGTCGAGAGGGTGAGTTTCG  | Blocking |
| n0--L13-L11- | GTACCGCAATTCTAAGAACGCGAGTATTATTT  | Blocking |
| n0--L15-L13- | AATTGAGAATTCTGTCCAGACGACTAAACCAA  | Blocking |
| n0--L17-L15- | ACCTTTTTATTTTAGTTAATTTTCATAGGGCTT | Blocking |
| n0--L19-L17- | CGCGCAGATTACCTTTTTTAATGGGAGAGACT  | Blocking |
| n0--L21-L19- | GCGGAACATCTGAATAATGGAAGGTACAAAAT  | Blocking |
| n0--L23-L21- | AGCCAGCAATTGAGGAAGGTTATCATCATTTT  | Blocking |
| n0--K24-L23- | ACCCTTCTGACCTGAAAAGCGTAAGACGCTGAG | Blocking |
| n0--L5-L3-   | CCACCCTCTATTACAAAACAAATACCTGCCTA  | Blocking |
| n0--L7-L5-   | TCACCGACGCACCGTAATCAGTAGCAGAACCG  | Blocking |
| n0--L9-L7-   | AAGGAAACATAAAGGTGGCAACATTATCACCG  | Blocking |
| n0--L11-L9-  | ATCCCAATGAGAATTAACCTGAACAGTTACCAG | Blocking |
| n0--M8-M10-  | AACGCAAAGATAGCCGAACAAACCCTGAAC    | Blocking |
| n0--M10-M12- | AAAGTCACAAAATAAACAGCCAGCGTTTTTA   | Blocking |
| n0--M12-M14- | GCGAACCTCCAAGAACGGGTATGACAATAA    | Blocking |
| n0--M14-M16- | ACAACATGCCAACGCTCAACAGTCTTCTGA    | Blocking |
| n0--M16-M18- | CCTAAATCAAAATCATAGGTCTAAACAGTA    | Blocking |
| n0--N1-M2-   | AGGAACCCATGTACCGTAACACTTGATATAA   | Blocking |
| n0--M18-M20- | CATAAATCTTTGAATACCAAGTGTTAGAAC    | Blocking |
| n0--M20-M22- | CTACCATAGTTTGAGTAACATTTAAAATAT    | Blocking |
| n0--M22-M24- | CTTTAGGGCCTGCAACAGTGCCAATACGTG    | Blocking |
| n0--M2-M4-   | GTATAGCAAACAGTTAATGCCCAATCCTCA    | Blocking |
| n0--M4-M6-   | TTAAAGCCAGAGCCGCCACCCTCGACAGAA    | Blocking |
| n0--M6-M8-   | TCAAGTTTCATTAAGGTGAATATAAAAAGA    | Blocking |
| n0--N3-N1-   | GCCCGTATCCGGAATAGGTGTATCAGCCCAAT  | Blocking |
| n0--N13-N11- | CTTATCATTCCCGACTTGCGGGAGCCTAATTT  | Blocking |
| n0--N15-N13- | AGTATAAAGTTCAGCTAATGCAGATGTCTTTC  | Blocking |
| n0--N17-N15- | GAATTTATTTAATGTTTTGAAATATTCTTACC  | Blocking |
| n0--N19-N17- | CCTGATTGCAATATATGTGAGTGATCAATAGT  | Blocking |
| n0--N21-N19- | ATTTTAAAATCAAAATATTTGCACGGATTCCG  | Blocking |
| n0--N23-N21- | TTAACACCAGCACTAACAACCTAATCGTTATTA | Blocking |
| n0--M24-N23- | GCACAGACAATATTTTTGAATGGGGTCAGTA   | Blocking |
| n0--N5-N3-   | GCCTCCCTCAGAATGGAAAGCGCAGTAACAGT  | Blocking |
| n0--N7-N5-   | GAAATTATTGCCTTTAGCGTCAGACCGGAACC  | Blocking |
| n0--N9-N7-   | AAGTAAGCAGACACCACCGGAATAATATTGACG | Blocking |
| n0--N11-N9-  | GCCAGTTAGAGGGTAATTGAGCGCTTTAAGAA  | Blocking |
| n0--O8-O10-  | TGTCACAATCTTACCGAAGCCCTTTAATATCA  | Blocking |
| n0--O10-O12- | GAGAGATAGAGCGTCTTTCCAGAGGTTTTGAA  | Blocking |
| n0--O12-O14- | GCCTTAAACCAATCAATAATCGGCACGCGCCT  | Blocking |

|                |                                              |          |
|----------------|----------------------------------------------|----------|
| n0--O14-O16-   | GTTTATCAATATGCGTTATACAAACCGACCGT             | Blocking |
| n0--O16-O18-   | GTGATAAAAAGACGCTGAGAAGAGATAACCTT             | Blocking |
| n0--P1-O2-     | CCACCCTCATTTTCAGGGATAGCAACCGTACT             | Blocking |
| n0--O18-O20-   | GCTTCTGTTCGGGAGAAACAATAACGTAAAAC             | Blocking |
| n0--O20-O22-   | AGAAATAAAAATCCTTTGCCCGAAAAGATTAGA            | Blocking |
| n0--O22-O24-   | GCCGTCAAAAAACAGAGGTGAGGCCTATTAGT             | Blocking |
| n0--O2-O4-     | CAGGAGGTGGGGTCAGTGCCTTGAGTCTCTGA             | Blocking |
| n0--O4-O6-     | ATTTACCGGGAACCAGAGCCACCACTGTAGCG             | Blocking |
| n0--O6-O8-     | CGTTTTCAAGGGAGGGAAGGTAAAGTTTATTT             | Blocking |
| n0--P3-P1-     | GTTTTAACTTAGTACCGCCACCCAGAGCCA               | Blocking |
| n0--P13-P11-   | TGTAGAAATCAAGATTAGTTGCTCTTACCA               | Blocking |
| n0--P15-P13-   | TTAGTATCACAATAGATAAGTCCACGAGCA               | Blocking |
| n0--P17-P15-   | CTTAGATTTAAGGCGTTAATAAAGCCTGT                | Blocking |
| n0--P19-P17-   | CTTTTACAAAATCGTCGCTATTAGCGATAG               | Blocking |
| n0--P21-P19-   | CTCGTATTAGAAATTGCGTAGATACAGTAC               | Blocking |
| n0--P23-P21-   | CAGAAGATTAGATAATACATTTGTGACAA                | Blocking |
| n0--O24-P23-   | CTTTAATGCGCGAACTGATAGCCCCACCAG               | Blocking |
| n0--P5-P3-     | AAATCACCTTCCAGTAAGCGTCAGTAATAA               | Blocking |
| n0--P7-P5-     | ACCGATTGTCGGCATTTCGGTCATAATCA                | Blocking |
| n0--P9-P7-     | AATAGCTATCAATAGAAAATTCAACATTCA               | Blocking |
| n0--P11-P9-    | ACGCTAACACCCACAAGAATTGAAAATAGC               | Blocking |
| n0--A2-A4-zJ   | AGGCTCCAGAGGCTTTGAGGACACGGGTAATTATACATCTA    | Docking  |
| n0--A6-A8-zJ   | CATCAAGTAAAACGAACTAACGAGTTGAGATTATACATCTA    | Docking  |
| n0--A10-A12-zJ | TTTACCCCAACATGTTTTAAATTTCCATATTTATACATCTA    | Docking  |
| n0--A14-A16-zJ | AACGCAAAATCGATGAACGGTACCGGTTGATTATACATCTA    | Docking  |
| n0--A18-A20-zJ | TGCATCTTTCCAGTCACGACGGCCTGCAGTTATACATCTA     | Docking  |
| n0--A22-A24-zJ | TTTTCACTCAAAGGGCGAAAAACCATCACCTTATACATCTA    | Docking  |
| n0--C2-C4-zJ   | TTTATCAGGACAGCATCGGAACGACACCAACCTTATACATCTA  | Docking  |
| n0--C6-C8-zJ   | TTCATTACGTCAGGACGTTGGGAAATGCAGATTTATACATCTA  | Docking  |
| n0--C10-C12-zJ | CGGATTGCAGAGCTTAATTGCTGAAACGAGTATTATACATCTA  | Docking  |
| n0--C14-C16-zJ | TATATTTTGTCAATTGCCTGAGAGTGAAGATTTTATACATCTA  | Docking  |
| n0--C18-C20-zJ | TATCGGCCGCAAGGCGATTAAGTTTACCGAGCTTATACATCTA  | Docking  |
| n0--C22-C24-zJ | GCCCTTCAGAGTCCACTATTAAGGGTGCCGTTTATACATCTA   | Docking  |
| n0--E2-E4-zJ   | AAACAGCTTTTTGCGGGATCGTCAACACTAAATTATACATCTA  | Docking  |
| n0--E6-E8-zJ   | TCATTACAGATGCGATTTTAAGAACAGGCATAGTTATACATCTA | Docking  |
| n0--E10-E12-zJ | CGAAAGACTTTTGATAAGAGGTCATATTTGCGATTATACATCTA | Docking  |
| n0--E14-E16-zJ | TAGGTAACTATTTTTGAGAGATCAAACGTTATTATACATCTA   | Docking  |
| n0--E18-E20-zJ | GCTTTCCGATTACGCCAGCTGGCGGCTGTTTCTTATACATCTA  | Docking  |
| n0--E22-E24-zJ | AGCAAGCGTAGGGTTGAGTGTGTAGGGAGCCTTATACATCTA   | Docking  |
| n0--G2-G4-zJ   | TGACAACTCGCTGAGGCTTGCATTATACCATTATACATCTA    | Docking  |

|                |                                              |         |
|----------------|----------------------------------------------|---------|
| n0--G6-G8-zJ   | AACACCAAATTTCAACTTTAATCGTTTACCTTATACATCTA    | Docking |
| n0--G10-G12-zJ | GCTTCAATCAGGATTAGAGAGTTATTTTCATTATACATCTA    | Docking |
| n0--G14-G16-zJ | GAGACAGCTAGCTGATAAATTAATTTTTGTTTATACATCTA    | Docking |
| n0--G18-G20-zJ | AGGCAAAGGGAAGGGCGATCGGCAATTCCATTATACATCTA    | Docking |
| n0--G22-G24-zJ | GCGAAAAATCCCTTATAAATCAAGCCGGCGTTATACATCTA    | Docking |
| n0--H5-I4-zJ   | TCATCGCCAACAAAGTACAACGGACGCCAGCATTATACATCTA  | Docking |
| n0--H9-I8-zJ   | CTTTTGCAGATAAAAACCAAATAAAGACTCCTTATACATCTA   | Docking |
| n0--H13-I12-zJ | TTCTACTACGCGAGCTGAAAAGTTACCGCGCTTATACATCTA   | Docking |
| n0--H17-I16-zJ | GCCATCAAGCTCATTTTTTAACACAAATCCATTATACATCTA   | Docking |
| n0--H21-I20-zJ | AAGCCTGGTACGAGCCGGAAGCATAGATGATGTTATACATCTA  | Docking |
| n0--G24-I24-zJ | AACGTGGCGAGAAAGGAAGGAAACCAGTAATTATACATCTA    | Docking |
| n0--K2-K4-zJ   | GCGGATAACCTATTATTCTGAAACAGACGATTTTATACATCTA  | Docking |
| n0--K6-K8-zJ   | CGATAGCATTGAGCCATTTGGAACGTAGAAATTATACATCTA   | Docking |
| n0--K10-K12-zJ | TTAGACGGCCAAATAAGAAACGATAGAAGGCTTTATACATCTA  | Docking |
| n0--K14-K16-zJ | GTAAGTAATCGCCATTTAACAAAACCTTTTTTATACATCTA    | Docking |
| n0--K18-K20-zJ | CATTTGAAGGCGAATTATTCATTTTTGTTTGGTTATACATCTA  | Docking |
| n0--K22-K24-zJ | TGAAAGGAGCAAATGAAAAATCTAGAGATAGATTATACATCTA  | Docking |
| n0--M2-M4-zJ   | GTATAGCAAACAGTTAATGCCCAATCCTCATTATACATCTA    | Docking |
| n0--M6-M8-zJ   | TCAAGTTTCATTAAAGGTGAATATAAAAAGATTATACATCTA   | Docking |
| n0--M10-M12-zJ | AAAGTCACAAAATAAACAGCCAGCGTTTTTATTATACATCTA   | Docking |
| n0--M14-M16-zJ | ACAACATGCCAACGCTCAACAGTCTTCTGATTATACATCTA    | Docking |
| n0--M18-M20-zJ | CATAAATCTTTGAATACCAAGTGTTAGAACTTATACATCTA    | Docking |
| n0--M22-M24-zJ | CTTTAGGGCCTGCAACAGTGCCAATACGTGTTATACATCTA    | Docking |
| n0--O2-O4-zJ   | CAGGAGTGGGGTCAGTGCCTTGAGTCTCTGATTATACATCTA   | Docking |
| n0--O6-O8-zJ   | CGTTTTCAAGGGAGGGAAGGTAAAGTTTTTTTTATACATCTA   | Docking |
| n0--O10-O12-zJ | GAGAGATAGAGCGTCTTTCCAGAGTTTTGAATTATACATCTA   | Docking |
| n0--O14-O16-zJ | GTTTATCAATATGCGTTATACAAACCGACGTTTATACATCTA   | Docking |
| n0--O18-O20-zJ | GCTTCTGTTGCGGAGAAACAATAACGTAAAACCTTATACATCTA | Docking |
| n0--O22-O24-zJ | GCCGTCAAAAAACAGAGGTGAGGCCTATTAGTTTATACATCTA  | Docking |

**Table S1. dNAM Staple Strands**

The staple strand name indicates the structure version (n0: a NAM-modified version of Jungmann's rectangle), the 5' end modification (ptt: passivation, polythymine for registration strands), the 5' end position, the 3' end position (see staple strand position map below), and the 3' end modification (z: 3' oriented dock; J: 3' Mid dock, for Docking strands).

|    | LR    | A    | B    | C    | D    | E    | F    | G    | H    | I    | J    | K    | L    | M    | N    | O    | P    | RR   |       |
|----|-------|------|------|------|------|------|------|------|------|------|------|------|------|------|------|------|------|------|-------|
| 24 | Light | Dark | Dark | Dark | Dark | Dark | Dark | Dark | Dark | Dark | Dark | Dark | Dark | Dark | Dark | Dark | Dark | Dark | Light |
| 23 | Light | Dark | Dark | Dark | Dark | Dark | Dark | Dark | Dark | Dark | Dark | Dark | Dark | Dark | Dark | Dark | Dark | Dark | Light |
| 22 | Light | Dark | Dark | Dark | Dark | Dark | Dark | Dark | Dark | Dark | Dark | Dark | Dark | Dark | Dark | Dark | Dark | Dark | Light |
| 21 | Light | Dark | Dark | Dark | Dark | Dark | Dark | Dark | Dark | Dark | Dark | Dark | Dark | Dark | Dark | Dark | Dark | Dark | Light |
| 20 | Light | Dark | Dark | Dark | Dark | Dark | Dark | Dark | Dark | Dark | Dark | Dark | Dark | Dark | Dark | Dark | Dark | Dark | Light |
| 19 | Light | Dark | Dark | Dark | Dark | Dark | Dark | Dark | Dark | Dark | Dark | Dark | Dark | Dark | Dark | Dark | Dark | Dark | Light |
| 18 | Light | Dark | Dark | Dark | Dark | Dark | Dark | Dark | Dark | Dark | Dark | Dark | Dark | Dark | Dark | Dark | Dark | Dark | Light |
| 17 | Light | Dark | Dark | Dark | Dark | Dark | Dark | Dark | Dark | Dark | Dark | Dark | Dark | Dark | Dark | Dark | Dark | Dark | Light |
| 16 | Light | Dark | Dark | Dark | Dark | Dark | Dark | Dark | Dark | Dark | Dark | Dark | Dark | Dark | Dark | Dark | Dark | Dark | Light |
| 15 | Light | Dark | Dark | Dark | Dark | Dark | Dark | Dark | Dark | Dark | Dark | Dark | Dark | Dark | Dark | Dark | Dark | Dark | Light |
| 14 | Light | Dark | Dark | Dark | Dark | Dark | Dark | Dark | Dark | Dark | Dark | Dark | Dark | Dark | Dark | Dark | Dark | Dark | Light |
| 13 | Light | Dark | Dark | Dark | Dark | Dark | Dark | Dark | Dark | Dark | Dark | Dark | Dark | Dark | Dark | Dark | Dark | Dark | Light |
| 12 | Light | Dark | Dark | Dark | Dark | Dark | Dark | Dark | Dark | Dark | Dark | Dark | Dark | Dark | Dark | Dark | Dark | Dark | Light |
| 11 | Light | Dark | Dark | Dark | Dark | Dark | Dark | Dark | Dark | Dark | Dark | Dark | Dark | Dark | Dark | Dark | Dark | Dark | Light |
| 10 | Light | Dark | Dark | Dark | Dark | Dark | Dark | Dark | Dark | Dark | Dark | Dark | Dark | Dark | Dark | Dark | Dark | Dark | Light |
| 9  | Light | Dark | Dark | Dark | Dark | Dark | Dark | Dark | Dark | Dark | Dark | Dark | Dark | Dark | Dark | Dark | Dark | Dark | Light |
| 8  | Light | Dark | Dark | Dark | Dark | Dark | Dark | Dark | Dark | Dark | Dark | Dark | Dark | Dark | Dark | Dark | Dark | Dark | Light |
| 7  | Light | Dark | Dark | Dark | Dark | Dark | Dark | Dark | Dark | Dark | Dark | Dark | Dark | Dark | Dark | Dark | Dark | Dark | Light |
| 6  | Light | Dark | Dark | Dark | Dark | Dark | Dark | Dark | Dark | Dark | Dark | Dark | Dark | Dark | Dark | Dark | Dark | Dark | Light |
| 5  | Light | Dark | Dark | Dark | Dark | Dark | Dark | Dark | Dark | Dark | Dark | Dark | Dark | Dark | Dark | Dark | Dark | Dark | Light |
| 4  | Light | Dark | Dark | Dark | Dark | Dark | Dark | Dark | Dark | Dark | Dark | Dark | Dark | Dark | Dark | Dark | Dark | Dark | Light |
| 3  | Light | Dark | Dark | Dark | Dark | Dark | Dark | Dark | Dark | Dark | Dark | Dark | Dark | Dark | Dark | Dark | Dark | Dark | Light |
| 2  | Light | Dark | Dark | Dark | Dark | Dark | Dark | Dark | Dark | Dark | Dark | Dark | Dark | Dark | Dark | Dark | Dark | Dark | Light |
| 1  | Light | Dark | Dark | Dark | Dark | Dark | Dark | Dark | Dark | Dark | Dark | Dark | Dark | Dark | Dark | Dark | Dark | Dark | Light |

**Table S2. dNAM Staple Strand Position Map**

The domains (A-P, LR, and RR) and helices (1-24) used to locate the staple strands are depicted.

| Name       | Sequence                                           | Modification |
|------------|----------------------------------------------------|--------------|
| A01        | CGGGGTTTCCTCAAGAGAAGGATTTTGAATTA                   |              |
| A02        | AGCGTCATGTCTCTGAATTTACCGACTACCTT                   |              |
| A03        | TTCATAATCCCCTTATTAGCGTTTTTCTTACC                   |              |
| A04        | ATGTTTTATGTCACAATCAATAGATATTAAC                    |              |
| A05        | TTTGATGATTAAGAGGCTGAGACTTGCTCAGTACCAGGCG           |              |
| A06        | CCGGAACCCAGAATGAAAAGCGCAACATGGCT                   |              |
| A07        | AAAGACAACATTTTCGGTCATAGCCAAAATCA                   |              |
| A08        | GACGGGAGAATTAACCTCGGAATAAGTTTATTTCCAGCGCC          |              |
| A09        | GATAAGTGCCGTCGAGCTGAAACATGAAAGTATACAGGAG           |              |
| A10        | TGTA CTGGAAATCCTCATTAAGCAGAGCCAC                   |              |
| A11        | CACCGGAAAGCGCGTTTTTCATCGGAAGGGCGA                  |              |
| A12-TT-Mid | CATTCAACAAACGCAAAGACACCAGAACACCCTGAACAAATTATACATCT | Docking site |
| A13        | TTTAACGGTTCGGAACCTATTATTAGGGTTGATATAAGTA           |              |
| A14        | CTCAGAGCATATTCACAAACAAATTAATAAGT                   |              |
| A15        | GGAGGGAATTTAGCGTCAGACTGTCCGCCTCC                   |              |
| A16        | GTCAGAGGGTAATTGATGGCAACATATAAAAAGCGATTGAG          |              |
| A17        | TAGCCC GGAATAGGTGAATGCCCCCTGCCTATGGTCAGTG          |              |
| A18        | CCTTGAGTCAGACGATTGGCCTTGCGCCACCC                   |              |
| A19        | TCAGAACCCAGAATCAAGTTTGCCGGTAAATA                   |              |
| A20        | TTGACGGAATACATACATAAAGGGCGCTAATATCAGAGA            |              |
| A21        | CAGAGCCAGGAGGTTGAGGCAGGTAACAGTGCCCCG               |              |
| A22        | ATTAAGGCCGTAATCAGTAGCGAGCCACCCT                    |              |
| A23        | GATAACCCACAAGAATGTTAGCAAACGTAGAAAATTATTC           |              |
| A24        | GCCGCCAGCATTGACACCACCCTC                           |              |
| A25        | AGAGCCGCACCATCGATAGCAGCATGAATTAT                   |              |
| A26        | CACCGTCACCTTATTACGCAGTATTGAGTTAAGCCCAATA           |              |
| A27        | AGCCATTTAAACGTCACCAATGAACACCAGAACCA                |              |
| A28        | ATAAGAGCAAGAAACATGGCATGATTAAGACTCCGACTTG           |              |
| A29        | CCATTAGCAAGGCCGGGGGAATTA                           |              |
| A30-TT-Mid | GAGCCAGCGAATACCCAAAAGAACATGAAATAGCAATAGCTTATACATCT | Docking site |
| A31        | TATCTTACCGAAGCCCAAACGCAATAATAACGAAAATCACCAG        |              |
| A32        | CAGAAGGAAACCGAGGTTTTTAAGAAAAGTAAGCAGATAGCCG        |              |
| A33        | CCTTTTTTCATTTAACAATTTTCATAGGATTAG                  |              |
| A34        | TTTAACCTATCATAGGTCTGAGAGTTCCAGTA                   |              |
| A35        | AGTATAAAATATGCGTTATACAAAGCCATCTT                   |              |
| A36        | CAAGTACCTCATTCCAAGAACGGGAAATTCAT                   |              |
| A37        | AGAGAATAACATAAAAACAGGGAAGCGCATT                    |              |
| A38        | AAAACAAAATTAATTAATGGAACAGTACATTAGTGAAT             |              |
| A39        | TTATCAAACCGGCTTAGGTTGGGTAAGCCTGT                   |              |
| A40        | TTAGTATCGCCAACGCTCAACAGTCGGCTGTC                   |              |
| A41        | TTTCCTTAGCACTCATCGAGAACAATAGCAGCCTTTACAG           |              |
| A42        | AGAGTCAAAAATCAATATATGTGATGAAACAAACATCAAG           |              |
| A43        | ACTAGAAATATATAACTATATGTACGCTGAGA                   |              |

|            |                                                       |              |
|------------|-------------------------------------------------------|--------------|
| A44        | TCAATAATAGGGCTTAATTGAGAATCATAATT                      |              |
| A45        | AACGTCAAAAATGAAAAGCAAGCCGTTTTATGAAACCAA               |              |
| A46        | GAGCAAAAGAAGATGAGTGAATAACCTTGCTTATAGCTTA              |              |
| A47        | GATTAAGAAATGCTGATGCAAATCAGAATAAA                      |              |
| A48        | CACCGGAATCGCCATATTTAACAAAATTTACG                      |              |
| A49-TT-Mid | AGCATGTATTTTCATCGTAGGAATCAAACGATTTTTGTTTTATACATCT     | Docking site |
| A50        | ACATAGCGCTGTAAATCGTCGCTATTCATTTCAATTACCT              |              |
| A51        | GTAAATACAATCGCAAGACAAAGCCTTGAAA                       |              |
| A52        | CCCATCCTCGCCAACATGTAATTTAATAAGGC                      |              |
| A53        | TCCAATCCAAATAAGATTACCGCGCCCAATAAATAATAT               |              |
| A54        | TCCCTTAGAATAACGCGAGAAAACCTTTACCGACC                   |              |
| A55        | GTGTGATAAGGCAGAGGCATTTTCAGTCCTGA                      |              |
| A56        | ACAAGAAAGCAAGCAAATCAGATAACAGCCATATTATTTA              |              |
| A57        | GTTTGAAATTCAAATATATTTTAG                              |              |
| A58        | AATAGATAGAGCCAGTAATAAGAGATTTAATG                      |              |
| A59        | GCCAGTTACAAAATAATAGAAGGCTTATCCGGTTATCAAC              |              |
| A60        | TTCTGACCTAAAATATAAAGTACCGACTGCAGAAC                   |              |
| A61        | GCGCCTGTTATTCTAAGAACGCGATTCCAGAGCCTAATTT              |              |
| A62        | TCAGCTAAAAAAGGTAAAGTAATT                              |              |
| A63        | ACGCTAACGAGCGTCTGGCGTTTTAGCGAACCCAACATGT              |              |
| A64-TT-Mid | ACGACAATAAATCCCGACTTGCGGGAGATCCTGAATCTTACCATTATACATCT | Docking site |
| A65        | TGCTATTTTGCACCCAGCTACAATTTGTTTTGAAGCCTTAAA            |              |
| B01        | TCATATGTGTAATCGTAAAACAGTCATTTTC                       |              |
| B02        | GTGAGAAAATGTGTAGGTAAAGATACAACCTTT                     |              |
| B03        | GGCATCAAATTTGGGGCGCGAGCTAGTTAAAG                      |              |
| B04        | TTCGAGCTAAGACTTCAAATATCGGGAACGAG                      |              |
| B05        | ACAGTCAAAGAGAATCGATGAACGACCCCGTTGATAATC               |              |
| B06        | ATAGTAGTATGCAATGCCTGAGTAGGCCGGAG                      |              |
| B07        | AACCAGACGTTTAGCTATATTTTCTTCTACTA                      |              |
| B08        | GAATACCACATTCAACTTAAGAGGAAGCCCGATCAAAGCG              |              |
| B09        | AGAAAAGCCCCAAAAGAGTCTGGAGCAAACAATCACCAT               |              |
| B10        | CAATATGACCCTCATATATTTTAAAGCATTAA                      |              |
| B11        | CATCCAATAAATGGTCAATAACCTCGGAAGCA                      |              |
| B12-TT-Mid | AACTCCAAGATTGCATCAAAAAGATAATGCAGATACATAATTATACATCT    | Docking site |
| B13        | CGTTCTAGTCAGGTCATTGCCTGACAGGAAGATTGTATAA              |              |
| B14        | CAGGCAAGATAAAAATTTTAGAATATTCAAC                       |              |
| B15        | GATTAGAGATTAGATACATTTGCAAATCATA                       |              |
| B16        | CGCCAAAAGGAATTACAGTCAGAAGCAAAGCGCAGGTCAG              |              |
| B17        | GCAAATATTTAAATTGAGATCTACAAAGGCTACTGATAAA              |              |
| B18        | TTAATGCCTTATTTCAACGCAAGGGCAAAGAA                      |              |
| B19        | TTAGCAAATAGATTTAGTTTGACCAGTACCTT                      |              |
| B20        | TAATTGCTTTACCCTGACTATTATGAGGCATAGTAAGAGC              |              |
| B21        | ATAAAGCCTTTGCGGGAGAAGCCTGGAGAGGGTAG                   |              |
| B22        | TAAGAGGTCAATTCTGCGAACGAGATTAAGCA                      |              |

|            |                                                      |              |
|------------|------------------------------------------------------|--------------|
| B23        | AACACTATCATAACCCATCAAAAATCAGGTCTCCTTTTGA             |              |
| B24        | ATGACCCTGTAATACTTCAGAGCA                             |              |
| B25        | TAAAGCTATATAACAGTTGATTCCCATTTTTG                     |              |
| B26        | CGGATGGCAGCAGAAATGACCATAATCGTTTACCAGACGAC            |              |
| B27        | TAATTGCTTGGAAGTTTCATTCCAAATCGGTTGTA                  |              |
| B28        | GATAAAAACCAAAATATTAACAGTTCAGAAATTAGAGCT              |              |
| B29        | ACTAAAGTACGGTGTCAATATAA                              |              |
| B30-TT-Mid | TGCTGTAGATCCCCCTCAAATGCTGCGAGAGGCTTTTGCATTATACATCT   | Docking site |
| B31        | AAAGAAGTTTTGCCAGCATAAATATTCATTGACTCAACATGTT          |              |
| B32        | AATACTGCGGAATCGTAGGGGTAATAGTAAAATGTTTAGACT           |              |
| B33        | AGGGATAGCTCAGAGCCACCACCCCATGTCAA                     |              |
| B34        | CAACAGTTTATGGGATTTTGCTAATCAAAAGG                     |              |
| B35        | GCCGCTTTGCTGAGGCTTGCAGGGGAAAAGGT                     |              |
| B36        | GCGCAGACTCCATGTTACTTAGCCCGTTTTAA                     |              |
| B37        | ACAGGTAGAAAGATTCATCAGTTGAGATTTAG                     |              |
| B38        | CCTCAGAACC GCCACCCAAGCCCAATAGGAACGTAAATGA            |              |
| B39        | ATTTTCTGTCCAGCGGAGTGAGAATACCGATAT                    |              |
| B40        | ATTCGGTCTGCGGGATCGTCACCCGAAATCCG                     |              |
| B41        | CGACCTGCGGTCAATCATAAGGGAACGGAACAACATTATT             |              |
| B42        | AGACGTTACCATGTACCGTAACACCCCTCAGAACC GCCAC            |              |
| B43        | CACGCATAAGAAAGGAACA ACTAAGTCTTTCC                    |              |
| B44        | ATTGTGTCTCAGCAGCGAAAGACACCATCGCC                     |              |
| B45        | TTAATAAAACGAACTAACCCGAACTGACCAACTCCTGATAA            |              |
| B46        | AGGTTTAGTACCGCCATGAGTTTCGTCACCAGGATCTAAA             |              |
| B47        | GTTTTGTCAGGAATTGCGAATAATCCGACAAT                     |              |
| B48        | GACAACAAGCATCGGAACGAGGGTGAGATTTG                     |              |
| B49-TT-Mid | TATCATCGTTGAAAGAGGACAGATGGAAGAAAAATCTACGTTATACATCT   | Docking site |
| B50        | AGCGTAACTACAACTACAACGCCTATCACCGTACTCAGG              |              |
| B51        | TAGTTGCGAATTTTTTTCACGTTGATCATAGTT                    |              |
| B52        | GTACAACGAGCAACGGCTACAGAGGATACCGA                     |              |
| B53        | ACCAGTCAGGACGTTGGAACGGTGTACAGACCGAAACAAA             |              |
| B54        | ACAGACAGCCCAAATCTCCAAAAAAAATTTCTTA                   |              |
| B55        | AACAGCTTGCTTTGAGGACTAAAGCGATTATA                     |              |
| B56        | CCAAGCGCAGGCGCATAGGCTGGCAGAACTGGCTCATTAT             |              |
| B57        | CGAGGTGAGGCTCCAAAAGGAGCC                             |              |
| B58        | ACCCCAGACTTTTTTCATGAGGAACTTGCTTT                     |              |
| B59        | ACCTTATGCGATTTTATGACCTTCATCAAGAGCATCTTTG             |              |
| B60        | CGTTTTATCAGGTTTCCATTAACGGGAATACT                     |              |
| B61        | AAAACACTTAATCTTGACAAGAACTTAATCATTGTGAATT             |              |
| B62        | GGCAAAAGTAAAATACGTAATGCC                             |              |
| B63        | TGTTTTAATTTCAACTCGGATATTCATTACCCACGAAAGA             |              |
| B64-TT-Mid | ACCAACCTAAAAATCAACGTAACAAATAAATTGGGCTTGAGATTATACATCT | Docking site |
| B65        | CCTGACGAGAAACACCAGAACGAGTAGGCTGCTCATTAGTGA           |              |
| C01        | TCGGGAGATATACAGTAACAGTACAAATAATT                     |              |



|            |                                                    |              |
|------------|----------------------------------------------------|--------------|
| C02        | CCTGATTAAGGAGCGGAATTATCTCGGCCTC                    |              |
| C03        | GCAAATCACCTCAATCAATATCTGCAGGTCGA                   |              |
| C04        | CGACCAGTACATTGGCAGATTCACCTGATTGC                   |              |
| C05        | TGGCAATTTTAAACGTCAGATGAAAACAATAACGGATTTCG          |              |
| C06        | AAGGAATTACAAAGAAACCACCAGTCAGATGA                   |              |
| C07        | GGACATTCACCTCAAATATCAAACACAGTTGA                   |              |
| C08        | TTGACGAGCACGTATACTGAAATGGATTATTTAATAAAAG           |              |
| C09        | CCTGATTGCTTTGAATTGCGTAGATTTTCAGGCATCAATA           |              |
| C10        | TAATCCTGATTATCATTGCGGAGAGGAAGG                     |              |
| C11        | TTATCTAAAGCATCACCTTGCTGATGGCCAAC                   |              |
| C12-TT-Mid | AGAGATAGTTTGACGCTCAATCGTACGTGCTTTCCTCGTTTTATACATCT | Docking site |
| C13        | GATTATACACAGAAATAAAGAAATACCAAGTTACAAAATC           |              |
| C14        | TAGGAGCATAAAAGTTTGAGTAACATTGTTTG                   |              |
| C15        | TGACCTGACAAATGAAAAATCTAAAATATCTT                   |              |
| C16        | AGAATCAGAGCGGGAGATGGAAATACCTACATAACCCTTC           |              |
| C17        | GCGCAGAGGCGAATTAATTATTTGCACGTAAAATCTGAAT           |              |
| C18        | AATGGAAGCGAACGTTATTAATTTCTAACAAC                   |              |
| C19        | TAATAGATCGCTGAGAGCCAGCAGAAGCGTAA                   |              |
| C20        | GAATACGTAACAGGAAAAACGCTCCTAACAGGAGGCCGA            |              |
| C21        | TCAATAGATATTAATCCTTTGCCGGTTAGAACCT                 |              |
| C22        | CAATATTTGCCTGCAACAGTGCCATAGAGCCG                   |              |
| C23        | TTAAAGGGATTTTAGATACCGCCAGCCATTGCGGCACAGA           |              |
| C24        | ACAATTCGACAACTCGTAATACAT                           |              |
| C25        | TTGAGGATGGTCAGTATTAACACCTTGAATGG                   |              |
| C26        | CTATTAGTATATCCAGAACAATATCAGGAACGGTACGCCA           |              |
| C27        | CGCCAACTAAAACAGAGGTGAGGCTTAGAAGTATT                |              |
| C28        | GAATCCTGAGAAGTGTATCGGCCTTGCTGGTACTTTAATG           |              |
| C29        | ACCACCAGCAGAAGATGATAGCCC                           |              |
| C30-TT-Mid | TAAAACATTAGAAGAACTCAAACTTTTATAATCAGTGAGTTATACATCT  | Docking site |
| C31        | GCCACCGAGTAAAAGAACATCACTTGCCTGAGCGCCATTAATA        |              |
| C32        | TCTTTGATTAGTAATAGTCTGTCCATCACGCAAATTAACCGTT        |              |
| C33        | CGCGTCTGATAGGAACGCCATCAACTTTTACA                   |              |
| C34        | AGGAAGATGGGGACGACGACAGTAATCATATT                   |              |
| C35        | CTCTAGAGCAAGCTTGCATGCCTGGTCAGTTG                   |              |
| C36        | CCTTCACCGTGAGACGGGCAACAGCAGTCACA                   |              |
| C37        | CGAGAAAGGAAGGGAAGCGTACTATGGTTGCT                   |              |
| C38        | GCTCATTTTTTAACCAGCCTTCCTGTAGCCAGGCATCTGC           |              |
| C39        | CAGTTTGACGCACTCCAGCCAGCTAAACGACG                   |              |
| C40        | GCCAGTGCGATCCCCGGGTACCGAGTTTTTCT                   |              |
| C41        | TTTCACCAGCCTGGCCCTGAGAGAAAAGCCGGCGAACGTGG          |              |
| C42        | GTAACCGTCTTTTCATCAACATTAATAATTTTGTAAATCA           |              |
| C43        | ACGTTGTATTCCGGCACCGCTTCTGGCGCATC                   |              |
| C44        | CCAGGGTGGCTCGAATTCGTAATCCAGTCACG                   |              |
| C45        | TAGAGCTTGACGGGGAGTTGCAGCAAGCGGTCATTGGGCG           |              |

|            |                                                      |              |
|------------|------------------------------------------------------|--------------|
| C46        | GTAAAAATTCGCATTAATGTGAGCGAGTAACACACGTTGG             |              |
| C47        | TGTAGATGGGTGCCGAAACCAGGAACGCCAG                      |              |
| C48        | GGTTTTCCATGGTCATAGCTGTTTGAGAGGCG                     |              |
| C49-TT-Mid | GTTTGCCTCACGCTGGTTTGCCCAAGGGAGCCCCGATTTTATACATCT     | Docking site |
| C50        | GGATAGGTACCCGTCGGATTCTCCTAAACGTTAATATTTT             |              |
| C51        | AGTTGGGTCAAAGCGCCATTCGCCCGTAATG                      |              |
| C52        | CGCGCGGGCCTGTGTGAAATTGTTGGCGATTA                     |              |
| C53        | CTAAATCGGAACCCTAAGCAGGCGAAAAATCCTTCGGCCAA            |              |
| C54        | CGGCGGATTGAATTCAGGCTGCGCAACGGGGGATG                  |              |
| C55        | TGCTGCAAATCCGCTCACAATTCAGCTGCA                       |              |
| C56        | TTAATGAAGTTTGATGGTGGTTCCGAGGTGCCGTAAAGCA             |              |
| C57        | TGGCGAAATGTTGGGAAGGGCGAT                             |              |
| C58        | TGTCGTGCACACAACATACGAGCCACGCCAGC                     |              |
| C59        | CAAGTTTTTTGGGGTCAAATCGGCAAAATCCGGGAAACC              |              |
| C60        | TCTTCGCTATTGGAAGCATAAAGTGTATGCCCGCT                  |              |
| C61        | TTCCAGTCCTTATAAATCAAAGAGAACCATCACCCAAAT              |              |
| C62        | GCGCTCACAAGCCTGGGGTGCCTA                             |              |
| C63        | CGATGGCCCACTACGTATAGCCCGAGATAGGGATTGCGTT             |              |
| C64-TT-Mid | AACTCACATTATTGAGTGTGTTCCAGAAACCGTCTATCAGGGTTATACATCT | Docking site |
| C65        | ACGTGGACTCCAACGTCAAAGGGCGAATTTGGAACAAGAGTCC          |              |
| Link-A1C   | TTAATTAATTTTTTACCATATCAAA                            |              |
| Link-A2C   | TTAATTTTATCTTAGACTTTACAA                             |              |
| Link-A3C   | CTGTCCAGACGTATACCGAACGA                              |              |
| Link-A4C   | TCAAGATTAGTGTAGCAATACT                               |              |
| Link-B1A   | TGTAGCATTCTTTTATAAACAGTT                             |              |
| Link-B2A   | TTTAATTGTATTTCCACCAGAGCC                             |              |
| Link-B3A   | ACTACGAAGGCTTAGCACCATTA                              |              |
| Link-B4A   | ATAAGGCTTGCAACAAAGTTAC                               |              |
| Link-C1B   | GTGGGAACAAATTTCTATTTTTGAG                            |              |
| Link-C2B   | CGGTGCGGGCCTTCCAAAAACATT                             |              |
| Link-C3B   | ATGAGTGAGCTTTTAAATATGCA                              |              |
| Link-C4B   | ACTATTAAGAGGATAGCGTCC                                |              |
| Loop       | GCGCTTAATGCGCCGCTACAGGGC                             |              |

**Table S3. Triangle Staple Strands**

The oligonucleotide sequences used for the sharp triangle origami design (used in the study as a fiducial marker) are indicated.

## Encoding/Decoding Algorithms

See attached diagrams and flowcharts for graphical representation of the main steps of the algorithms. **Table S4** lists the different designs generated by the encoding algorithm for the message 'Data is in our DNA!\n'.

| Index | Binary Index | Droplet              | Matrix Design                                                        | Index | Binary Index | Droplet              | Matrix Design                                                        | Index | Binary Index | Droplet              | Matrix Design                                                        |
|-------|--------------|----------------------|----------------------------------------------------------------------|-------|--------------|----------------------|----------------------------------------------------------------------|-------|--------------|----------------------|----------------------------------------------------------------------|
| 0     | 0000         | 00110110<br>01010101 | 00110110<br>11110111<br>00111010<br>00110111<br>11011110<br>00101010 | 5     | 0101         | 01011111<br>01001011 | 01011111<br>11010101<br>10111000<br>00101001<br>11000010<br>10110100 | 10    | 1010         | 01101110<br>00000101 | 01101110<br>11010101<br>00000110<br>11011110<br>11111100<br>01101000 |
| 1     | 0001         | 00100110<br>01100000 | 00100110<br>10101001<br>10110100<br>00011101<br>11111100<br>00000001 | 6     | 0110         | 00010000<br>01101001 | 00010000<br>11101011<br>00011010<br>11100011<br>10000110<br>10100101 | 11    | 1011         | 00010001<br>00001010 | 00010001<br>11100111<br>10011010<br>10000000<br>10101110<br>01010100 |
| 2     | 0010         | 01011111<br>00111010 | 01011111<br>11011001<br>00011100<br>10111100<br>11100100<br>00010111 | 7     | 0111         | 01010100<br>00001000 | 01010100<br>10100001<br>11100000<br>11011000<br>11011000<br>10000100 | 12    | 1100         | 01001110<br>01000110 | 01001110<br>11001101<br>01000100<br>00000001<br>11000100<br>11011000 |
| 3     | 0011         | 00100001<br>01010110 | 00100001<br>10000101<br>10011110<br>10010001<br>11100010<br>00011010 | 8     | 1000         | 00100000<br>01101001 | 00100000<br>10111111<br>01000100<br>01010011<br>11100100<br>01100101 | 13    | 1101         | 01010010<br>01110110 | 01010010<br>10011111<br>11001100<br>01010011<br>11001110<br>11011011 |
| 4     | 0100         | 00011010<br>00010010 | 00011010<br>11111011<br>00111110<br>00010000<br>11011000<br>10010010 | 9     | 1001         | 00100000<br>01101111 | 00100000<br>11011011<br>10101100<br>00010011<br>11010000<br>01111101 | 14    | 1110         | 00001010<br>01111101 | 00001010<br>11010101<br>01101100<br>10001011<br>10010100<br>11101111 |

**Table S4. Origami Designs**

The binary data droplets and data strings associated with each origami index are shown.

## Atomic Force Microscopy

AFM analysis was conducted on freshly cut mica substrates or glass coverslips (prepared as described above). 4  $\mu\text{L}$  of a dNAM origami sample was deposited onto the substrate for 5 min and then 100  $\mu\text{L}$  of deposition buffer added to form a droplet on top of the sample. AFM imaging was performed with a Dimension-FastScan system from Bruker set to amplitude modulation mode. Imaging was carried out in liquid with a set-point ratio between the free amplitude and imaging amplitude of  $\sim 0.7$ . The FastScan D cantilever was supplied by Bruker, with a nominal spring constant of 0.25 N/m. Sub-nanometer amplitude was used to image DNA docking strand positions on every origami structure following the method of<sup>1</sup>. Tilt correction (line or plane flattening) was performed using WSxM software package version 5.0 Develop 9.2<sup>2</sup> (Nanotec Electronica, Madrid, Spain) and a low-pass filter applied to remove noise. Further filtering, using inverse FFT band rejection, was added to visually highlight the docking strands.

## Supplementary Results

### DNA-PAINT Resolution

To evaluate the resolution of the DNA-PAINT experiments, FWHM values were derived by taking transect measurements centered on binding sites in rendered images (with 1-pixel blur applied) of either individual or 'averaged' dNAM origami (**Fig. S1**). In both cases at least ten binding sites were examined for each structure using with horizontally or vertically aligned positioned transects (**Fig. S1 a,b**). FWHM values of  $6.6 \text{ nm} \pm 1.6 \text{ SD}$  (single origami images,  $n = 124$ ) and  $7.2 \text{ nm} \pm 0.3 \text{ SD}$  (averaged origami images,  $n = 47$ ) were calculated from Gaussian fits to plots of the transect data (**Fig. S1 c,d**).

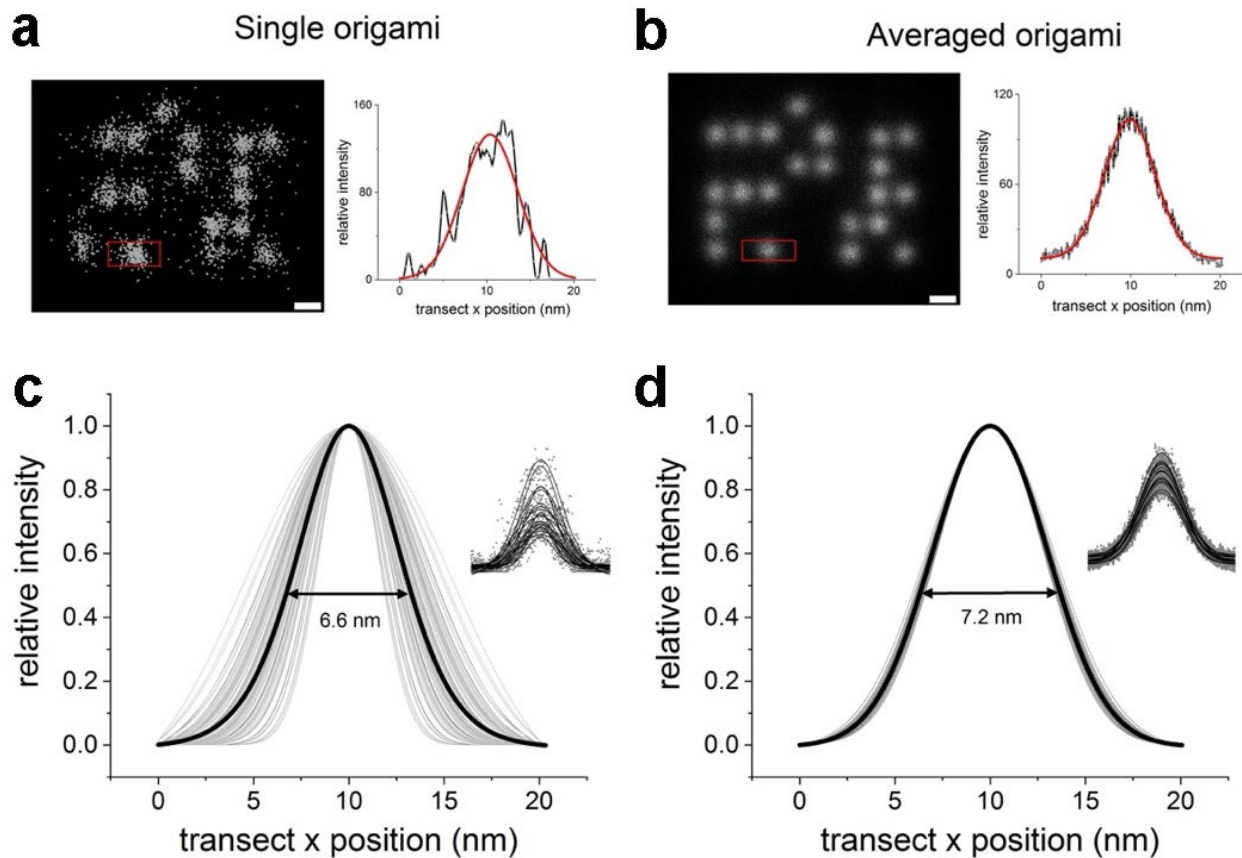

**Figure S1. DNA-PAINT imaging of dNAM origami demonstrates low nm resolution for 'averaged' and individual structures**

FWHM values were derived by taking transect measurements centered on binding sites in rendered images of either individual (**a**) or 'averaged' dNAM origami (**b**). Transects were placed horizontally (as shown in red) on vertically for measurements. A plot from a single binding site is shown with a Gaussian fit to the data plotted in red. Gaussian fits for binding sites from each experiment are plotted in grey for both single (**c**) and 'averaged' (**d**) structures (after centering and normalization). The mean of the grey lines is shown in black. The inset plots are the representative results from a single experimental recording. The mean FWHM value for individual fits to each experiment was calculated and reported in the main text. Origami-6 was used in all cases, as it was the most consistently recovered structure. (**a-b**) Scale bars, 10 nm. Single examples are shown. (**c-d**)  $n = 124$  (single) and 47 (averaged) sites over 3 independent DNA-PAINT recordings.

### Proximity Error Analysis

Analysis of our error locations (**Fig. S2**) showed slightly higher false negative error rates around the edges of dNAM origami, but there was no pattern of error locations in the origami that would explain the variance in error rates between different origami designs. There is a correlation between a higher number of 1-bits and a higher number of false negatives, as would be expected, but this does not explain most of the observed variance between origami. The phenomenon of higher errors near the edges of the origami has been observed previously<sup>3</sup> and was interpreted as reflecting a difference in staple strand incorporation efficiencies. To investigate this and other sources of potential sources of error in our array designs, we performed atomic force microscopy (AFM) imaging on individual origami deposited on mica (**Fig. S3**). From the averaged SRM images in **Fig. 2**, it can be seen that every data strand was recorded at least once for all expected positions in all arrays. This suggests that there were no systematic failures in strand incorporation or data strand binding domains. This is further substantiated by the AFM images, in which origami were typically both well formed (lacking holes and having the expected dimensions) and appeared to have incorporated the majority of their data strands. Although it was possible to resolve the majority of data strands positions (**Fig. S3**), a strict analysis on missing data strands using AFM would not be completely reliable since tip-sample interactions could easily promote strand compression and displacement. However, our previous correlative defect analysis of DNA origami, combining AFM and DNA-PAINT, indicated that strand incorporation plays a role in origami site yields and defects are likely due to the unavailability of incorporated staple strands. Further, DNA-PAINT itself may locally increase the susceptibility of DNA origami to damage during imaging<sup>4</sup>. This is in keeping with our results and suggests that further optimization of the DNA-PAINT imaging protocol will help reduce the false negative error rate.

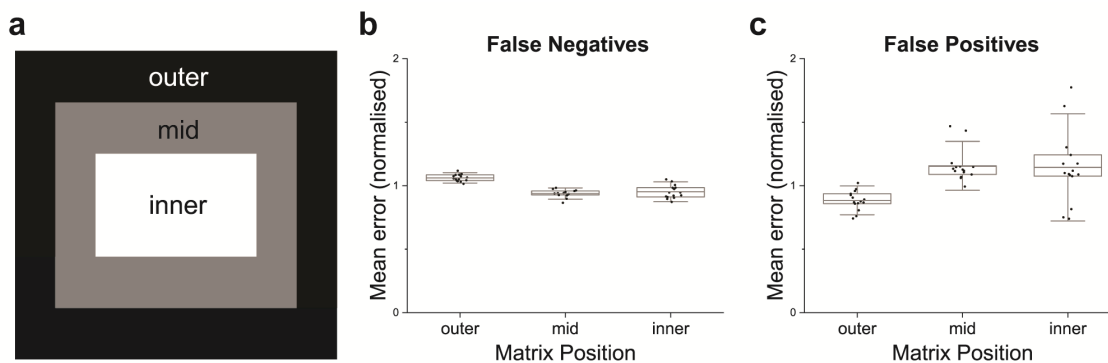

**Figure S2. The outer edges and inner regions of dNAM origami are differentially error prone**

The array positions of DNA origami (only considering structures with 15 or less errors, as identified by template matching) were classified as either 'outer', 'mid' or 'inner' depending on their position in the array (a). The mean error for each classification was calculated and normalized by dividing by the overall mean error for that zone. Plots of the mean normalized false negative (b) and false positive values (c) for each zone are shown. Individual data points plot the mean errors for each origami design. The box plots depict mean values and the 25-75% range, with whiskers plotting the SD. n = 15 origami designs over 3 DNA-PAINT recordings.

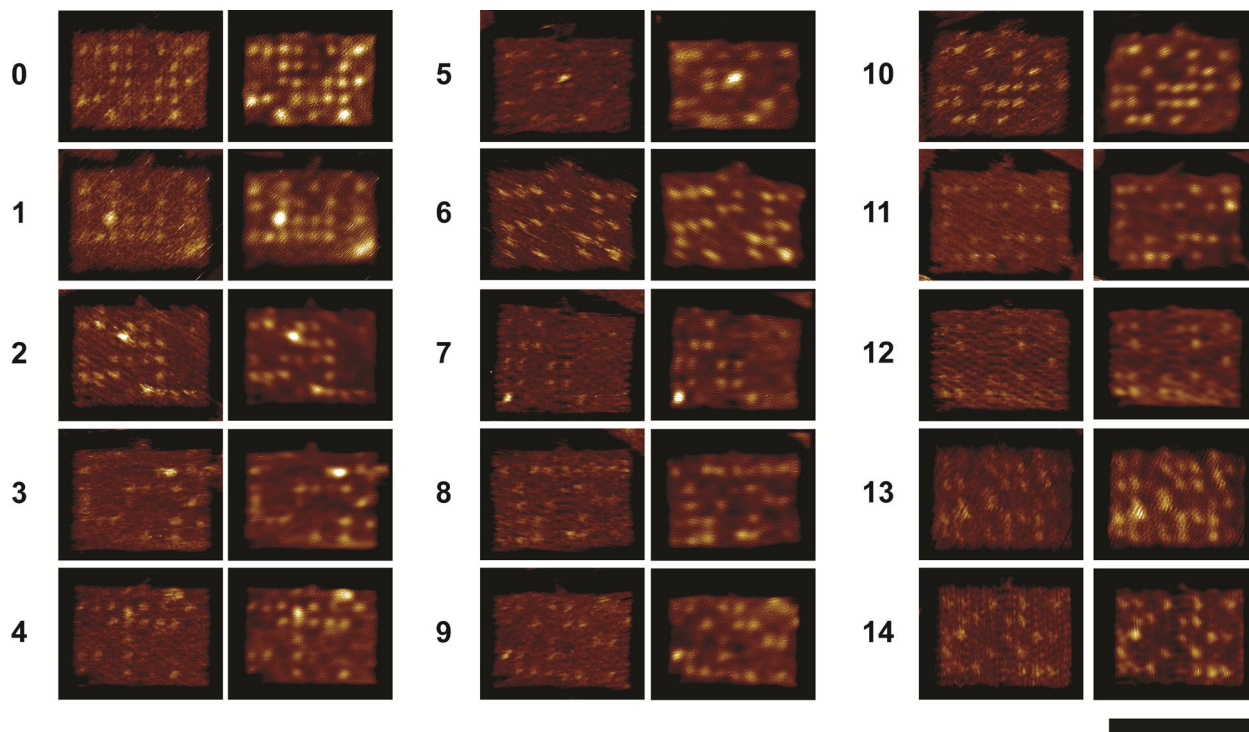

**Figure S3. AFM images of dNAM origami**

Representative AFM images of all 15 dNAM “Data is in our DNA!/n” origami, where most of dockings sites are visible. (An inverse FFT analysis with a band rejected filter has been applied to highlight the docking positions in right-hand panels). Every image is 90 x110 nm<sup>2</sup> and the color scale ranges over 250 pm. Black scale bar is 100 nm.

## Supplementary Diagrams and Charts

### Figure S4. The Encoding Algorithm

The multi-page figure below illustrates the twelve steps involved in encoding a text message using dNAM. The encoding process depicts the proof-of-principle experiment described in the main text, showing the design process for one of the 15 origami, as an example.

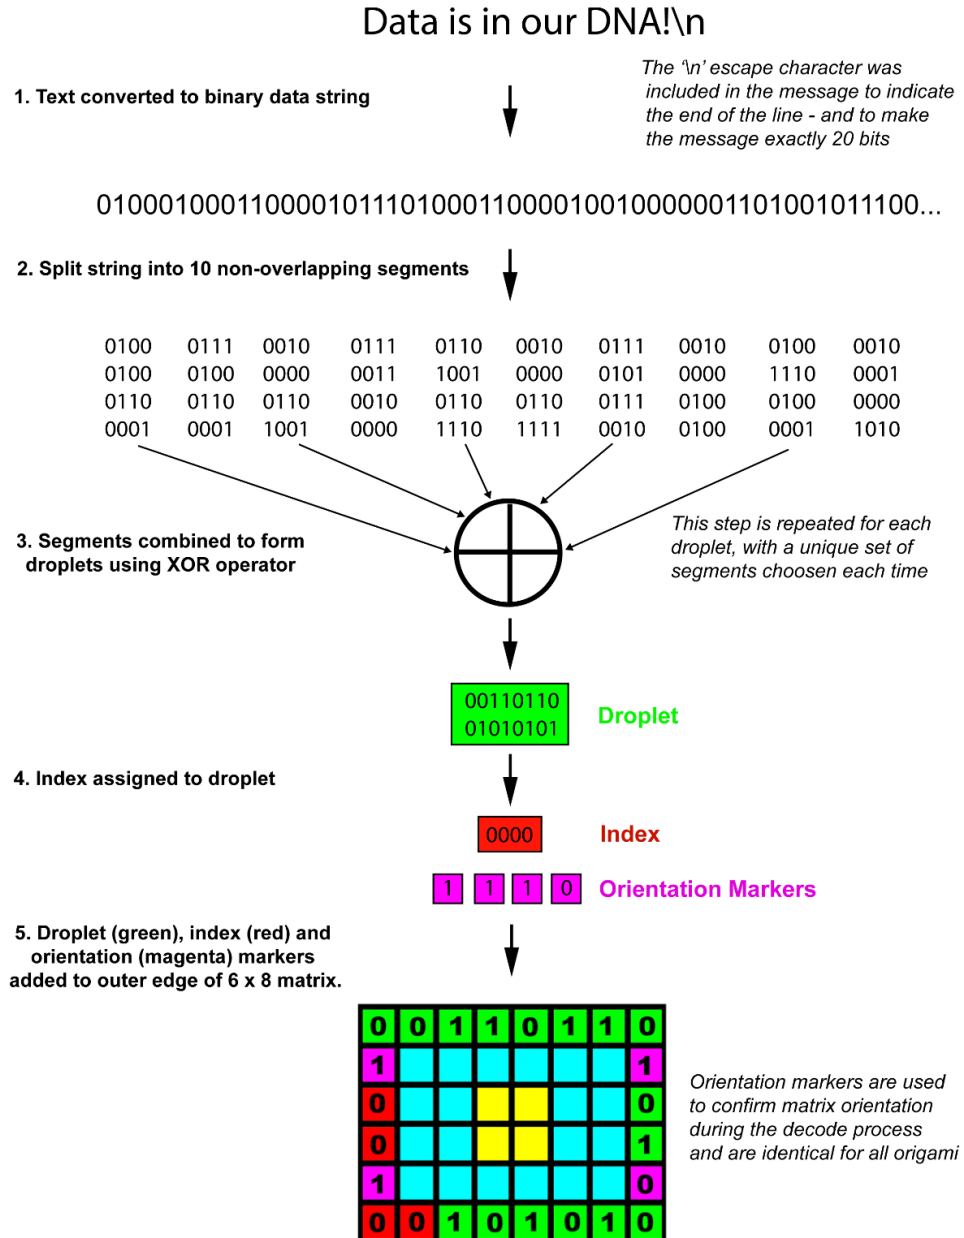

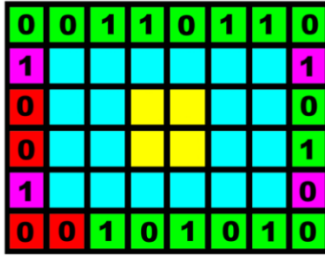

6. Checksum bits calculated from symmetrically positioned matrix edge values

|    |    |    |    |    |    |    |    |
|----|----|----|----|----|----|----|----|
| 1  | 2  | 3  | 4  | 5  | 6  | 7  | 8  |
| 9  | 10 | 11 | 12 | 13 | 14 | 15 | 16 |
| 17 | 18 | 19 | 20 | 21 | 22 | 23 | 24 |
| 25 | 26 | 27 | 28 | 29 | 30 | 31 | 32 |
| 33 | 34 | 35 | 36 | 37 | 38 | 39 | 40 |
| 41 | 42 | 43 | 44 | 45 | 46 | 47 | 48 |

↓

*Bit values extracted by matrix position to generate checksum values*

| Matrix Position | 1 | 2 | 3 | 4 | 5 | 6 | 7 | 8 | 9 | 16 | 17 | 24 | 25 | 32 | 33 | 40 | 41 | 42 | 43 | 44 | 45 | 46 | 47 | 48 | XOR result |   |
|-----------------|---|---|---|---|---|---|---|---|---|----|----|----|----|----|----|----|----|----|----|----|----|----|----|----|------------|---|
| Binary Value    | 0 | 0 | 1 | 1 | 0 | 1 | 1 | 0 | 1 | 1  | 0  | 0  | 0  | 1  | 1  | 0  | 0  | 0  | 1  | 0  | 1  | 0  | 1  | 0  | 20         | 1 |
|                 | ✓ |   | ✓ |   |   |   |   |   |   |    | ✓  |    |    |    |    |    |    |    | ✓  |    | ✓  |    | ✓  |    | 21         | 1 |
|                 |   |   |   | ✓ |   |   | ✓ |   |   |    |    | ✓  |    |    |    | ✓  | ✓  |    | ✓  |    | ✓  |    | ✓  |    | 28         | 1 |
|                 |   | ✓ |   |   | ✓ |   |   |   |   |    |    |    | ✓  | ✓  |    |    |    |    |    |    |    | ✓  | ✓  |    | 29         | 0 |

↑  
Matrix position of result

7. Checksum bits added to center of matrix (yellow)

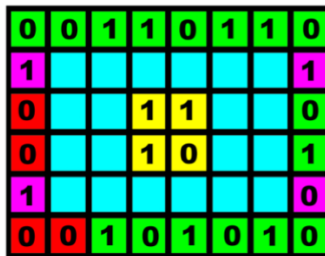



|   |   |   |   |   |   |   |   |
|---|---|---|---|---|---|---|---|
| 0 | 0 | 1 | 1 | 0 | 1 | 1 | 0 |
| 1 |   |   |   |   |   |   | 1 |
| 0 |   |   | 1 | 1 |   |   | 0 |
| 0 |   |   | 1 | 0 |   |   | 1 |
| 1 |   |   |   |   |   |   | 0 |
| 0 | 0 | 1 | 0 | 1 | 0 | 1 | 0 |

8. Parity bits calculated from symetrically positioned edge values and checksum

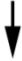

| Matrix Position | 1 | 8 | 41 | 48 | 2 | 7 | 42 | 47 | 43 | 46 | 3 | 6 | 4 | 5 | 44 | 45 | 9 | 16 | 33 | 40 | 17 | 24 | 25 | 32 | 20 | 21 | 28 | 29 | XOR result |    |    |    |   |
|-----------------|---|---|----|----|---|---|----|----|----|----|---|---|---|---|----|----|---|----|----|----|----|----|----|----|----|----|----|----|------------|----|----|----|---|
| Binary Value    | 0 | 0 | 0  | 0  | 0 | 1 | 0  | 1  | 1  | 0  | 1 | 1 | 1 | 0 | 0  | 1  | 1 | 1  | 1  | 0  | 0  | 0  | 0  | 0  | 1  | 1  | 1  | 1  | 0          |    |    |    |   |
|                 | ✓ |   |    |    | ✓ |   |    |    |    |    |   | ✓ |   |   |    | ✓  |   |    |    |    |    |    |    |    |    | ✓  |    |    |            |    | 10 | 1  |   |
|                 |   | ✓ |    |    |   | ✓ |    |    |    |    |   | ✓ |   |   |    | ✓  |   |    |    |    |    |    |    |    |    |    | ✓  |    |            |    | 15 | 1  |   |
|                 |   |   | ✓  |    |   |   | ✓  |    |    |    |   | ✓ |   |   |    | ✓  |   |    |    |    |    |    |    |    |    |    |    | ✓  |            |    | 34 | 1  |   |
|                 |   |   |    | ✓  |   |   |    | ✓  | ✓  |    |   |   | ✓ |   |    |    |   |    |    |    |    |    |    |    |    |    |    | ✓  |            |    | 39 | 1  |   |
|                 |   |   |    |    | ✓ |   |    |    |    |    |   |   | ✓ |   |    |    |   |    |    |    |    |    |    |    |    |    |    |    |            | 11 | 1  |    |   |
|                 |   |   |    |    |   | ✓ |    |    |    |    |   |   |   | ✓ |    |    |   |    |    |    |    |    |    |    |    |    | ✓  |    |            |    | 14 | 1  |   |
|                 |   |   |    |    |   |   | ✓  |    |    |    |   |   |   |   | ✓  |    |   |    |    |    |    |    |    |    |    |    | ✓  |    |            |    | 35 | 0  |   |
|                 |   |   |    |    |   |   |    | ✓  |    |    |   |   |   |   |    | ✓  |   |    |    |    |    |    |    |    |    |    | ✓  |    |            |    | 38 | 1  |   |
|                 | ✓ |   |    |    |   |   |    |    | ✓  |    |   |   |   | ✓ |    |    |   |    |    |    |    |    |    |    |    | ✓  |    |    |            |    | 12 | 1  |   |
|                 |   | ✓ |    |    |   |   |    |    |    | ✓  |   |   |   | ✓ |    |    |   |    |    |    |    |    |    |    |    |    | ✓  |    |            |    |    | 13 | 0 |
|                 |   |   | ✓  |    |   |   |    |    |    |    | ✓ |   |   |   |    | ✓  |   |    |    |    |    |    |    |    |    |    | ✓  |    |            |    |    | 36 | 1 |
|                 |   |   |    | ✓  |   |   |    |    |    |    |   | ✓ |   |   |    |    | ✓ |    |    |    |    |    |    |    |    |    | ✓  |    |            |    |    | 37 | 1 |
|                 |   |   |    |    | ✓ |   |    |    |    |    |   |   | ✓ |   |    |    |   | ✓  |    |    |    |    |    |    |    |    | ✓  |    |            |    |    | 26 | 0 |
|                 |   |   |    |    |   | ✓ |    |    |    |    |   |   |   | ✓ |    |    |   |    | ✓  |    |    |    |    |    |    |    | ✓  |    |            |    |    | 31 | 1 |
|                 |   |   |    |    |   |   | ✓  |    |    |    |   |   |   |   | ✓  |    |   |    |    | ✓  |    |    |    |    |    |    | ✓  |    |            |    |    | 18 | 0 |
|                 |   |   |    |    |   |   |    | ✓  |    |    |   |   |   |   |    | ✓  |   |    |    |    | ✓  |    |    |    |    |    | ✓  |    |            |    |    | 23 | 1 |
|                 |   |   |    |    |   |   |    |    | ✓  |    |   |   |   |   |    |    | ✓ |    |    |    |    | ✓  |    |    |    |    | ✓  |    |            |    |    | 27 | 1 |
|                 |   |   |    |    |   |   |    |    |    | ✓  |   |   |   |   |    |    |   | ✓  |    |    |    |    |    |    |    |    | ✓  |    |            |    |    | 30 | 1 |
|                 |   |   |    |    |   |   |    |    |    |    | ✓ |   |   |   |    |    |   |    | ✓  |    |    |    |    |    |    |    | ✓  |    |            |    |    | 19 | 1 |
|                 |   |   |    |    |   |   |    |    |    |    |   | ✓ |   |   |    |    |   |    |    | ✓  |    |    |    |    |    |    | ✓  |    |            |    |    | 22 | 0 |

This is similar to step 6, however the same values are combined in multiple different XOR operations

Matrix position of result

9. Parity bits added to remaining matrix positions (blue)

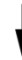

|   |   |   |   |   |   |   |   |
|---|---|---|---|---|---|---|---|
| 0 | 0 | 1 | 1 | 0 | 1 | 1 | 0 |
| 1 | 1 | 1 | 1 | 0 | 1 | 1 | 1 |
| 0 | 0 | 1 | 1 | 1 | 0 | 1 | 0 |
| 0 | 0 | 1 | 1 | 0 | 1 | 1 | 1 |
| 1 | 1 | 0 | 1 | 1 | 1 | 1 | 0 |
| 0 | 0 | 1 | 0 | 1 | 0 | 1 | 0 |

|   |   |   |   |   |   |   |   |
|---|---|---|---|---|---|---|---|
| 0 | 0 | 1 | 1 | 0 | 1 | 1 | 0 |
| 1 | 1 | 1 | 1 | 0 | 1 | 1 | 1 |
| 0 | 0 | 1 | 1 | 1 | 0 | 1 | 0 |
| 0 | 0 | 1 | 1 | 0 | 1 | 1 | 1 |
| 1 | 1 | 0 | 1 | 1 | 1 | 1 | 0 |
| 0 | 0 | 1 | 0 | 1 | 0 | 1 | 0 |

9. DNA-origami design created with the droplet, index, orientations markers, checksum bits, and parity bits encoded into the matrix

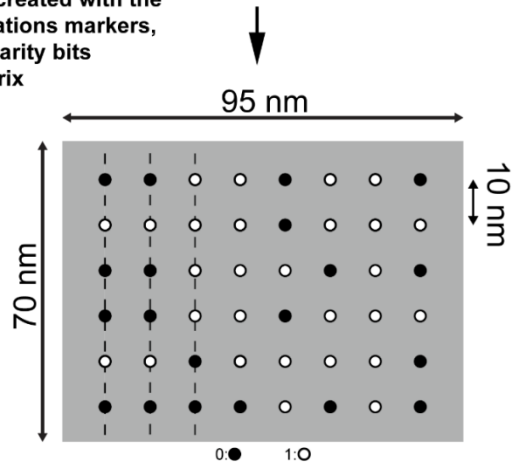

10. DNA-origami assembled from staple strands and scaffold in PCR thermocycler and purified by gel filtration

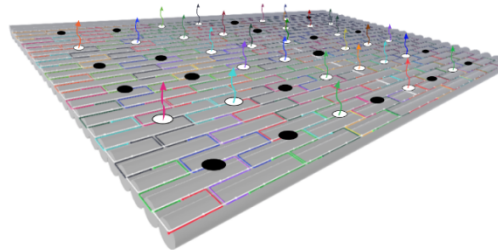

11. DNA-origami combined and stored at 4C

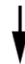

*Fifteen different origami designs (one for each droplet) were used to encode the message 'Data is in our DNA!n'. Each origami was diluted to 0.33 nM for storage.*

**4°C storage**

## 4°C storage

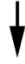

### 12. DNA-origami tested using DNA-PAINT

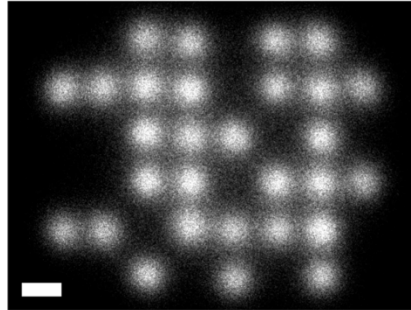

*A small aliquot (1-2  $\mu$ l) of the storage mix was diluted and deposited onto a microscope slide (using glow discharge) for DNA-PAINT imaging*

*An averaged image of origami-0 (the first of the fifteen designs) is shown here. Even though each of the individual single images from which the average is made is likely to be missing data from one or more data cells (due to data strands not correctly incorporating themselves into the origami structure, or insufficient imager strands binding to the data strand to get a 'read'), all the data cells are recorded correctly in the average. This suggests no systematic failure occurred during the origami assembly. Similar averages were created for all fifteen origami designs, and all data cells in all origami were observed as expected.*

### Figure S5. The Decoding Algorithm

The main steps involved in decoding a message from dNAM are depicted. First, each individual origami captured in a DNA-PAINT recording is converted into a binary string (**Image Processing**). Next, errors in each binary string are detected and corrected if possible (**Error Correction**) using the algorithm described in Flowchart 1 (**SI Fig. S6**) and **index and droplet data extracted**. Finally, segment information is retrieved from the droplets (**Segment Information Extracted**) pooled with data from other origami and passed to the fountain code decoding algorithm shown in Flowchart 2 (**SI Fig. S6**), which reassembles the original file (**Fountain Code Decoding**).

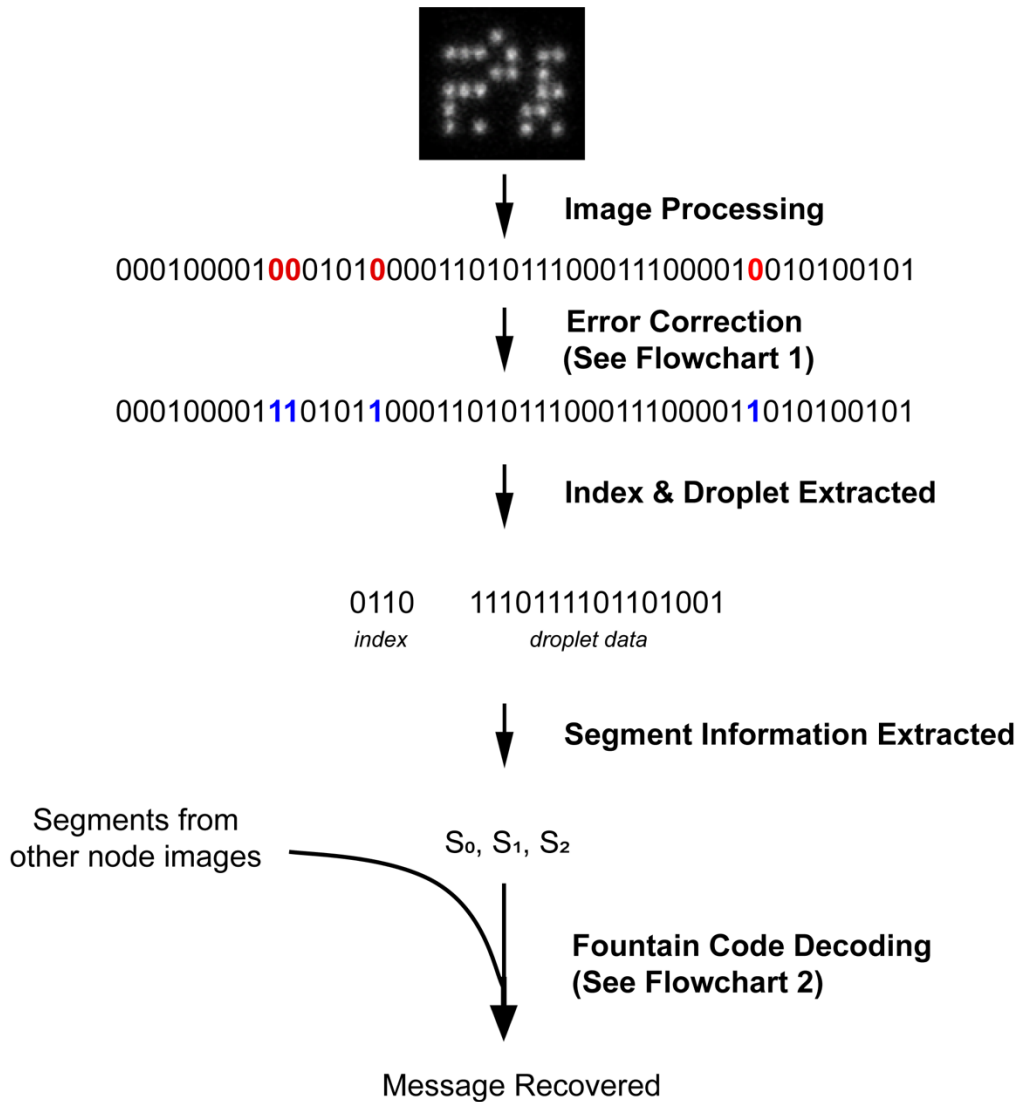

### Figure S6. Flowchart 1 - Error Correction

A flowchart depicting the operations performed by the error correction algorithm for an individual origami is shown. A priority queue is initialized with an individual origami  $m$  (the *working\_matrix*). Based on the parity and checksum bits mismatch, the algorithm deduces a set of probable errors and a matrix weight for the working matrix. The matrix weight is proportional to the number of errors, and the main goal of the algorithm is to reduce the matrix weight in a greedy fashion. To that end, each of the probable errors in the *working\_matrix* is sequentially flipped, and a matrix weight calculated for every resulting matrix. The two resulting matrices with the lowest weights are enqueued. The algorithm then replaces the *working\_matrix* with the recalculated matrix possessing the lowest matrix weight from the queue. If the current working matrix already has 9 bits flipped it is discarded and the next matrix in the queue used. The algorithm repeats these steps until the matrix weight equals zero, at this point the data in the origami is considered to have been error-corrected and is passed to the next stage of the decoding (**Accept**). If the priority queue is emptied before the matrix weight reaches zero, the origami data is considered unrecoverable and is removed from the analysis (**Reject**).

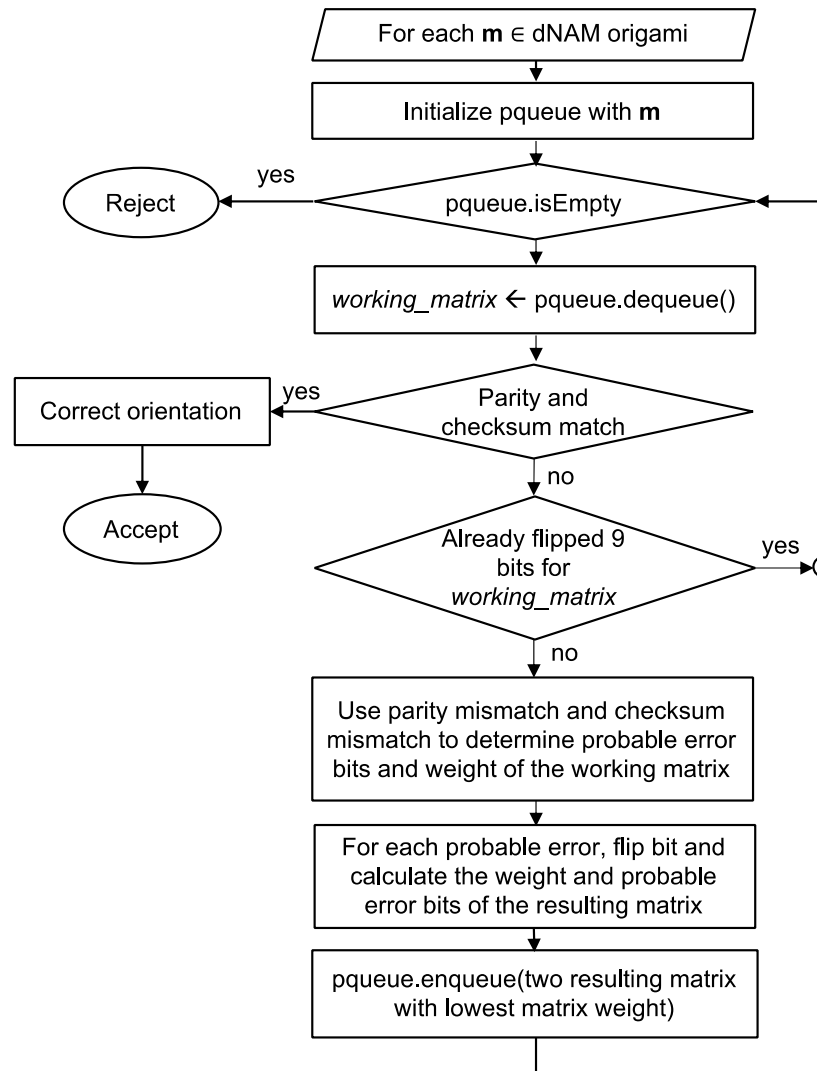

### Figure S7. Flowchart 2 - Fountain Code Decoding

A flowchart demonstrating the operations performed by the fountain decoding algorithm to recover file segment data from droplet data is shown. After retrieving the binary data from the dNAM origami images, the dNAM decoding algorithm corrects errors in the binary data and extracts both the index and droplet information. The droplets are collected (**Droplet Table**), with each droplet containing one or more file segments. The data in single degree droplets, such as D<sub>9</sub> and D<sub>8</sub>, encode single segments and are used directly to reconstruct the file (**Recovered File**).

To extract additional individual segment data from multi-segment droplets, the decoding algorithm performs a series of **XOR operations**. The index information allows the algorithm to determine both the degree of the droplet and which segments of the file that the droplet encodes. Taking the case of D<sub>2</sub>, a series of XOR operations must be performed in order to retrieve additional segment data from it. The decoding algorithm may XOR a multi-degree droplet with another droplet if the other droplet's segment(s) are a proper subset of the multi-degree droplet. For example, the segments contained in D<sub>6</sub> are a proper subset of those in D<sub>2</sub>. After XORing D<sub>2</sub> and D<sub>6</sub> a new droplet is generated containing segments S<sub>5</sub> and S<sub>6</sub>, which ultimately leads to the algorithm extracting the data for S<sub>6</sub>.

This process is repeated in a greedy fashion until the algorithm retrieves all of the file's segment data (**Recovered File**), or it runs out of options for XORing droplets (in which case the entire file cannot be successfully recovered). For simplicity, only six of the 15 possible droplets are shown, with the resulting recovered segments depicted in colored boxes (**Recovered Segments**).

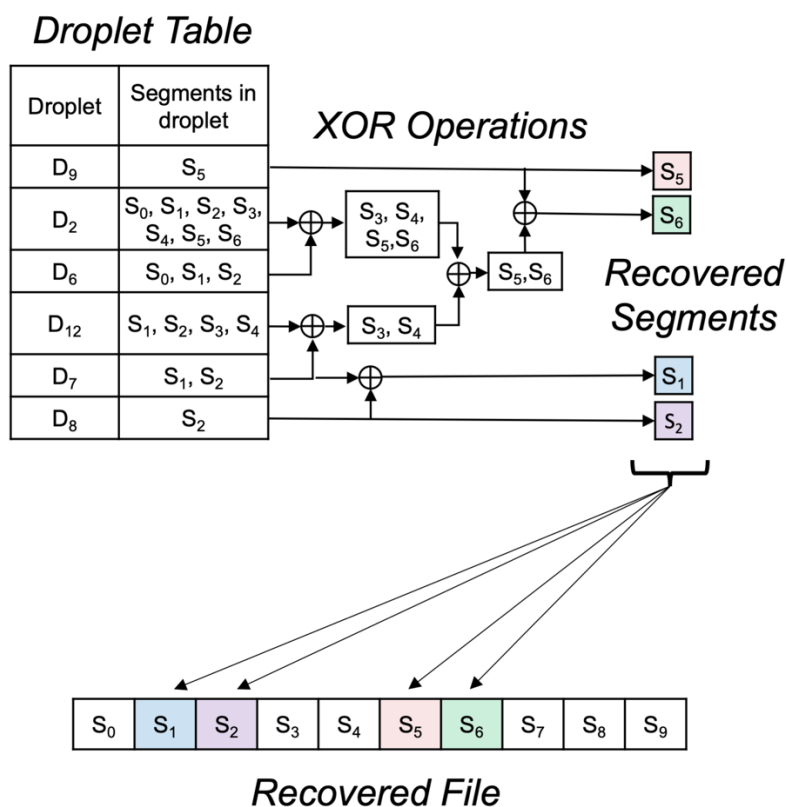

**Figure S8. dNAM Summary**

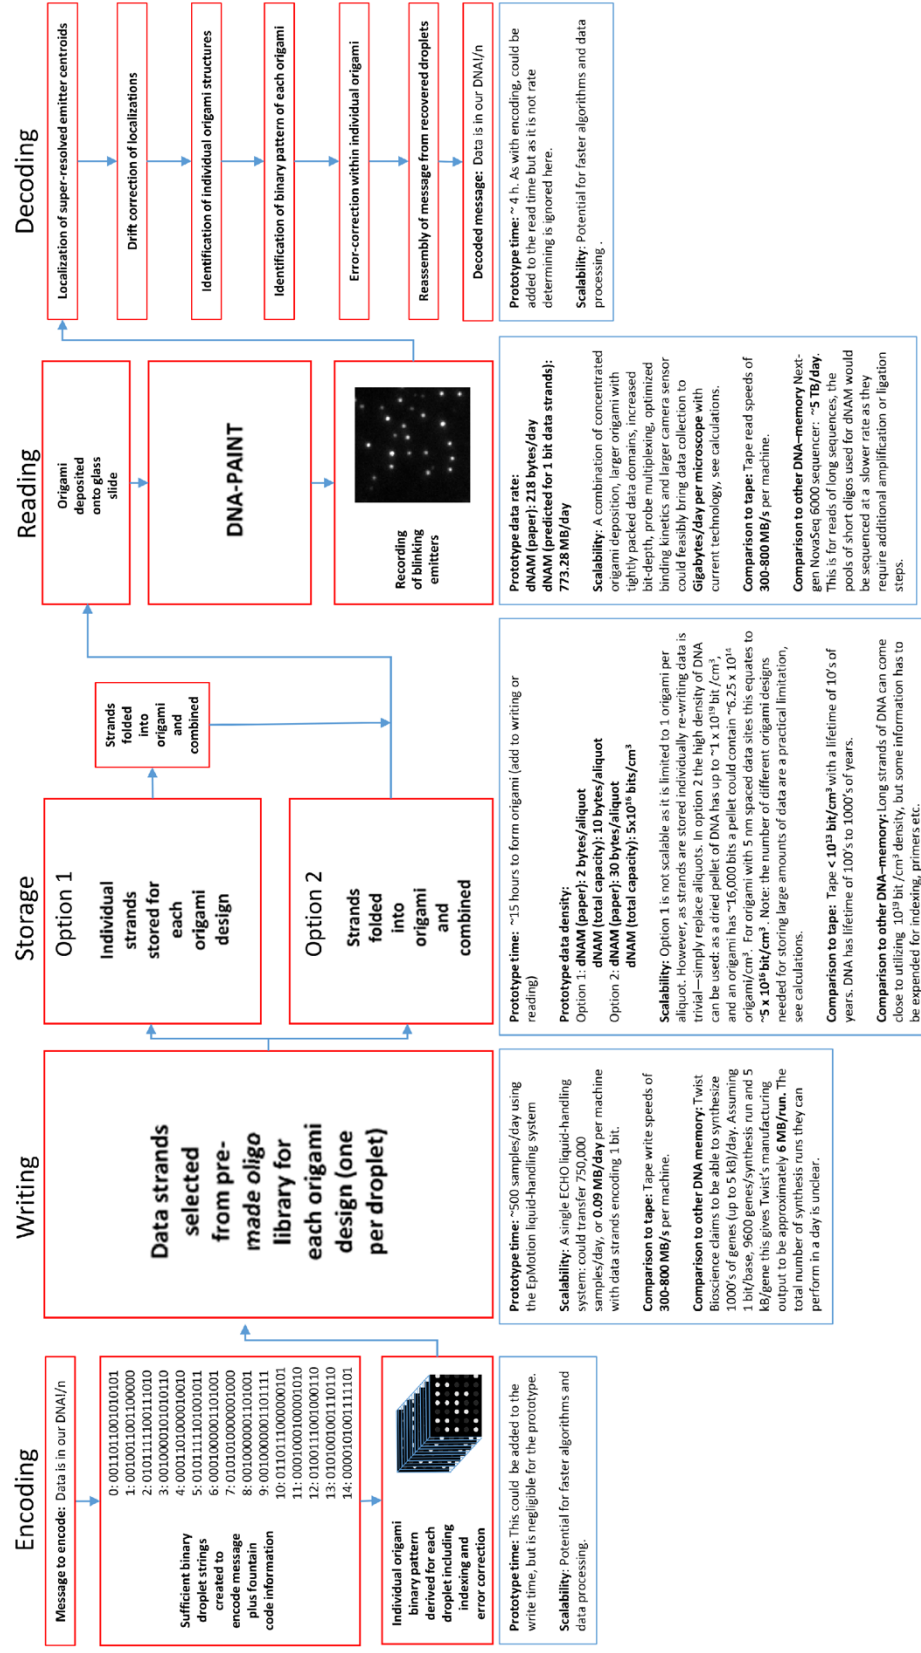

## Supplementary Notes

### Writing Speed

#### **1. Echo liquid-handling system capacity**

**0.09 MB/day** per machine (for writing dNAM prototype memory with 1 bit / domain)

##### **Calculation**

- From Labcyte website (<https://www.labcyte.com/echo-liquid-handling>) and documentation (Labcyte Inc. *Echo*® 520 *Liquid Handler Technical Specifications Version 2.0*) an Echo can process ~750,000 samples/day.
- In the dNAM prototype there is one 1 data strand oligo per aliquot that needs to be transferred
- 1 data strand = 1 bit of stored information
- ∴ 750,000 data strand transfers = 750,000 bits/10<sup>6</sup> = 0.75 Mb
- 0.75 Mb / 8 = 0.0938 MB  
→ **0.09 MB/day** per machine

#### **2. TWIST Bioscience DNA synthesis**

**6 MB/day** per synthesis run

We were not able to find exact values for long strands of DNA. However, on their website Twist Bioscience claims to be able to synthesize 1000's of genes a day, up to 5 kB maximum length (also see Leproust 2016<sup>5</sup>). It isn't clear how many synthesis runs TWIST can actually perform per day (including QC etc.). However, as they only claim to be able to synthesize 1000's of genes/day, while each silicon chip can potentially handle 9,600 and is highly parallizable, it suggests their capacity could be considerably higher. As the global demand for synthetic DNA in 2015 was ~6 Gbases<sup>6</sup> (or ~750 MB) the estimated value may be in line with market demand.

##### **Calculation**

- For simplicity, assuming 1 bit/base (range of 0.19—1.71 bit/base for DNA-memory systems including primers, see Organick 2018) and 9600 genes (1 silicon chip's worth) per synthesis run:
- 9600 genes x 5000 bits = 48x10<sup>6</sup> bits = 48 Mb
- 48 Mb / 8 = 6 MB/synthesis run  
→ **6 MB/day** per synthesis run

#### **3. Magnetic Tape**

**300-800 MB/s** per machine

(LTO-tape-drives,

[https://www.ibm.com/support/knowledgecenter/STQRQ9/com.ibm.storage.ts4500.doc/performance\\_specs\\_lto\\_drives.html](https://www.ibm.com/support/knowledgecenter/STQRQ9/com.ibm.storage.ts4500.doc/performance_specs_lto_drives.html))



## Storage—Data Density

### **1. dNAM, unfolded data strands**

**Prototype: 2 bytes/aliquot**

**Total capacity (5 nm spaced data domains, no error-correction or indexing): 10 bytes/aliquot**

For unfolded strands, in the dNAM prototype each origami design must be stored separately.

#### **Calculations**

##### dNAM prototype

- 1 data droplet (16 bits) per origami  
→ **2 bytes/aliquot**

##### Total capacity (5 nm spaced data domains, no error-correction or indexing)

The total capacity of a dNAM origami (without indexing, error-correction etc.) can be derived from the total number of bits available.

- For 5 x 5 nm spaced data domains on a rectangular platform there are 80 bits/origami  
→ **10 bytes/aliquot.**

*Note: If indexing information is added to each strand, such that strands specific to an origami design could either be purified from a mixture, or self-assemble into the correct origami design, then data strands do not need to be stored separately. Storing them mixed would allow a dramatic increase in data density—perhaps getting close to the  $10^{19}$  bit/cm<sup>3</sup> capacity of duplexed DNA<sup>7</sup>.*

### **2. dNAM, data strands folded into origami**

**Prototype: 30 bytes/aliquot**

**Total capacity (5 nm spaced data domains, no error-correction or indexing):  $5 \times 10^{16}$  bits/cm<sup>3</sup>**

After folding with scaffold DNA, origami can be stored mixed together increasing the amount of data per aliquot.

#### **Calculations**

##### dNAM prototype

- 15 data droplets (16 bits each) = 240 bits/aliquot  
→ **30 bytes/aliquot**

##### Total capacity (5 nm spaced data domains, no error-correction or indexing)

- A dried pellet of duplexed DNA has up to  $\sim 1 \times 10^{19}$  bit/cm<sup>3</sup> (from Zhirnov *et al.*, 2016<sup>7</sup>)
- A dNAM origami has  $\sim 16,000$  bits total (including scaffold DNA and extended data strands)
- Assuming origami pack similarly to duplexed DNA, a pellet could contain  $\sim 6.25 \times 10^{14}$  origami/cm<sup>3</sup>
- Origami with single bit data strands and 5 nm spacing have 80 bits/origami (without indexing, error-correction, etc.)
- $80 \text{ bits/origami} \times 6.25 \times 10^{14} \text{ origami/cm}^3 = 5 \times 10^{16} \text{ bits/cm}^3$

→  $5 \times 10^{16}$  bits/cm<sup>3</sup>

*Note: While this storage capacity is significantly higher than magnetic tape, in practice a huge number of origami designs would need to be created to take full advantage of the available storage density. For example, with 80 bits/origami available, to store 1TB of data (no error-correction) 46% of the origami will need to be dedicated to indexing and  $\sim 1 \times 10^{11}$  different dNAM origami synthesized. Selecting the data strands alone would require  $\sim 80 \times 10^{11}$  selections from a library of premade oligonucleotides. With an Echo system this would take  $2 \times 10^6$  years. Another theoretical option could be to have all possible combinations of origami synthesized by a company like TWIST However, even then—at 6 MB/synthesis run it would take 166,666 runs to synthesize 1TB of DNA.*

### 1. DNA Storage capacity

$\sim 1 \times 10^{19}$  bit/cm<sup>3</sup> (Zhirvnov *et al.*, 2016<sup>7</sup>)

### 2. Magnetic Tape Capacity

224 Gbit/in<sup>2</sup> (<https://blocksandfiles.com/2020/06/29/fujifilm-400tb-magnetic-tape-cartridge-future/>)

#### Calculation

- $224 \text{ Gbit/in}^2 / 6.4516 = 34.7 \text{ Gb/cm}^2$   
→  $3.47 \times 10^{10}$  bit/cm<sup>2</sup>

## Reading Speeds

### 1. dNAM/DNA-PAINT

**Prototype: 218 bytes/day** per microscope

**Prototype with 5 nm spaced data domains, dense deposition, 100 x speed-up and largest camera sensor available (total data, not considering error-correction, indexing and post-processing overhead): 773.28 MB/day** per microscope

The latest report on DNA-PAINT by Strauss and Jungmann<sup>8</sup> describes a 100X speed-up in data collection for origami very similar to those we image in dNAM. 5 nm resolution was demonstrated with 100 ms camera integration times.

High deposition densities are feasible, especially as improved algorithms for processing dense SRM data have been, and continue to be developed (e.g. deepSTORM<sup>9</sup>, DECODE<sup>10</sup>). deepSTORM is capable of processing data with a density of  $\sim 6$  emitters/ $\mu\text{m}^2$ : with a 512x512 sensor of 2,982  $\mu\text{m}^2$  this is equivalent to  $\sim 17,900$  emitters/frame.

A combination of concentrated origami deposition, larger origami with tightly packed data domains, increased bit-depth, probe multiplexing, optimized binding kinetics and larger camera sensor could feasibly bring data collection to **Gigabytes/day** per microscope with current technology.

### **Calculation**

#### dNAM prototype

- 3.3 h for a 40,000 frame recording to recover 15 origami data (30 bytes)
- 30 bytes / 3.3 h  
→ **218 bytes/day**

#### dNAM prototype with 5nm spaced data domains, 100 x speed-up, densely deposited origami and 1024 x 1024 camera sensor

- $\sim 6$  emitters/ $\mu\text{m}^2$  for 5964  $\mu\text{m}^2$  frame = 71600 emitters/frame
- For 5 nm spaced grid:  $\sim 80$  binding events per site needed to achieve 5nm resolution (Schnitzbauer 2017)
- 71600 emitters/frame / 80 binding sites/site = 895 sites/frame
- 5 nm camera integration time = 0.1 s
- 1 site = 1 bit
- 8950 bits/s x 86400 s/day  
→ **773.28 MB/day**

### 2. NovaSeq 6000 sequencer

**$\sim 5$  TB/day** (<https://www.illumina.com/science/technology/next-generation-sequencing.html>)

This is for reads of long sequences, the pools of short oligonucleotides used for dNAM would be sequenced at a considerably slower rate as they require additional amplification or ligation steps

### 3. Magnetic Tape

**300-800 MB/s**

(LTO-tape-drives,

[https://www.ibm.com/support/knowledgecenter/STQRQ9/com.ibm.storage.ts4500.doc/performance\\_specs\\_lto\\_drives.html](https://www.ibm.com/support/knowledgecenter/STQRQ9/com.ibm.storage.ts4500.doc/performance_specs_lto_drives.html))

## **Supplementary References**

1. Miller, E. J. *et al.* Sub-nanometer resolution imaging with amplitude-modulation atomic force microscopy in liquid. *J. Vis. Exp.* **2016**, 1–10 (2016).
2. Horcas, I. *et al.* WSXM: A software for scanning probe microscopy and a tool for nanotechnology. *Rev. Sci. Instrum.* **78**, (2007).
3. Strauss, M. T., Schueder, F., Haas, D., Nickels, P. C. & Jungmann, R. Quantifying absolute addressability in DNA origami with molecular resolution. *Nat. Commun.* **9**, 1–7 (2018).
4. Green, C. Nanoscale Optical and Correlative Microscopies for Quantitative Characterization of DNA Nanostructures. *Journal of Chemical Information and Modeling* vol. 53 (Boise State University, 2019).
5. Leproust, E. Rewriting DNA Synthesis. *Chem. Eng. Prog.* **112**, 30–35 (2016).
6. Organick, L. *et al.* Random access in large-scale DNA data storage. *Nat. Biotechnol.* **36**, 242–248 (2018).
7. Zhirnov, V., Zadegan, R. M., Sandhu, G. S., Church, G. M. & Hughes, W. L. Nucleic acid memory. *Nat. Mater.* **15**, 366–370 (2016).
8. Strauss, S. & Jungmann, R. Up to 100-fold speed-up and multiplexing in optimized DNA-PAINT. *Nat. Methods* **17**, 789–791 (2020).
9. Nehme, E., Weiss, L. E., Michaeli, T. & Shechtman, Y. Deep-STORM: super-resolution single-molecule microscopy by deep learning. *Optica* **5**, 458 (2018).
10. Matti, U., Obara, C. J., Wesley, R., Speiser, A. & Lucas-raphael, M. Deep learning enables fast and dense single-molecule localization with high accuracy. 1–28 (2020).
