# Supplementary material for: An alternative approach to nucleic acid memory
Source: PubMed Central journal article supplement (PMC8062470; doi:10.1038/s41467-021-22277-y), 2021-04-22
Supplement: 41467_2021_22277_MOESM2_ESM.pdf [file 41467_2021_22277_MOESM2_ESM.pdf]

**Editorial Note:** This manuscript has been previously reviewed at another journal that is not operating a transparent peer review scheme. This document only contains reviewer comments and rebuttal letters for versions considered at *Nature Communications*. Mentions of prior referee reports have been redacted.
